# Supplementary material
Source: ML conference proceedings conference paper supplement (https://openreview.net/forum?id=xAHozxfuUW)
Supplement: supplementary_material [file Appendix.pdf › SupplementaryMaterials/Appendix.pdf]

## References

- [1] Z. Abbasiantaeb, Y. Yuan, E. Kanoulas, and M. Aliannejadi. Let the LLMs talk: Simulating human-to-human conversational QA via zero-shot LLM-to-LLM interactions. *Proceedings of the 17th ACM International Conference on Web Search and Data Mining*, 2023.
- [2] M. Abdin, J. Aneja, H. Awadalla, A. Awadallah, A. A. Awan, N. Bach, A. Bahree, A. Bakhtiari, J. Bao, H. Behl, et al. Phi-3 technical report: A highly capable language model locally on your phone. *arXiv preprint arXiv:2404.14219*, 2024.
- [3] J. Achiam, S. Adler, S. Agarwal, L. Ahmad, I. Akkaya, F. L. Aleman, D. Almeida, J. Altenschmidt, S. Altman, S. Anadkat, et al. GPT-4 technical report. *arXiv preprint arXiv:2303.08774*, 2023.
- [4] A. Angelopoulos, S. Bates, J. Malik, and M. I. Jordan. Uncertainty sets for image classifiers using conformal prediction. *arXiv preprint arXiv:2009.14193*, 2020.
- [5] A. N. Angelopoulos and S. Bates. Conformal prediction: A gentle introduction. *Foundations and Trends® in Machine Learning*, 16(4):494–591, 2023.
- [6] Y. Ba, M. Mancenido, and R. Pan. Fill in the gaps: Model calibration and generalization with synthetic data. In *Conference on Empirical Methods in Natural Language Processing*, pages 17211–17225, 2024.
- [7] J. Bai, S. Bai, Y. Chu, Z. Cui, K. Dang, X. Deng, Y. Fan, W. Ge, Y. Han, F. Huang, et al. Qwen technical report. *arXiv preprint arXiv:2309.16609*, 2023.
- [8] S. Bates, E. Candès, L. Lei, Y. Romano, and M. Sesia. Testing for outliers with conformal p-values. *The Annals of Statistics*, 51(1):149–178, 2023.
- [9] A. M. Bean, R. Payne, G. Parsons, H. R. Kirk, J. Ciro, R. Mosquera, S. H. Monsalve, A. S. Ekanayaka, L. Tarassenko, L. Rocher, et al. Clinical knowledge in llms does not translate to human interactions. *arXiv preprint arXiv:2504.18919*, 2025.
- [10] A. Ben Abacha and D. Demner-Fushman. A question-entailment approach to question answering. *BMC bioinformatics*, 20:1–23, 2019.
- [11] L. Bertolazzi, D. Mazzaccara, F. Merlo, and R. Bernardi. ChatGPT’s information seeking strategy: Insights from the 20-questions game. In *Proceedings of the 16th International Natural Language Generation Conference*, pages 153–162, 2023.
- [12] G. M. Biancofiore, Y. Deldjoo, T. D. Noia, E. Di Sciascio, and F. Narducci. Interactive question answering systems: Literature review. *ACM Computing Surveys*, 56(9):1–38, 2024.
- [13] A. Bodrova, P. Xu, J. Varley, A. Zeng, A. Majumdar, D. Sadigh, S. Singh, F. Xia, N. Brown, L. Takayama, A. Z. Ren, A. Dixit, Z. Xu, and S. Tu. Robots that ask for help: Uncertainty alignment for large language model planners. *ArXiv*, abs/2307.01928, 2023. URL <https://api.semanticscholar.org/CorpusId:259342058>.
- [14] A. Chattopadhyay, S. Slocum, B. D. Haeffele, R. Vidal, and D. Geman. Interpretable by design: Learning predictors by composing interpretable queries. *IEEE Transactions on Pattern Analysis and Machine Intelligence*, 2022.
- [15] A. Chattopadhyay, K. H. R. Chan, B. D. Haeffele, D. Geman, and R. Vidal. Variational information pursuit for interpretable predictions. *arXiv preprint arXiv:2302.02876*, 2023.
- [16] A. Chattopadhyay, R. Pilgrim, and R. Vidal. Information maximization perspective of orthogonal matching pursuit with applications to explainable ai. *Advances in Neural Information Processing Systems*, 36:2956–2990, 2023.
- [17] A. Chattopadhyay, K. H. R. Chan, and R. Vidal. Bootstrapping variational information pursuit with large language and vision models for interpretable image classification. In *The Twelfth International Conference on Learning Representations*, 2024.

- [18] J. Chen and J. Mueller. Quantifying uncertainty in answers from any language model and enhancing their trustworthiness. In *Annual Meeting of the Association for Computational Linguistics*, 2023. URL <https://api.semanticscholar.org/CorpusId:263611057>.
- [19] Y. Chen, S. H. Hassani, A. Karbasi, and A. Krause. Sequential information maximization: When is greedy near-optimal? In *Conference on Learning Theory*, pages 338–363. PMLR, 2015.
- [20] Z. Chen, K. Zhou, B. Zhang, Z. Gong, W. X. Zhao, and J. rong Wen. Chatcot: Tool-augmented chain-of-thought reasoning on chat-based large language models. *ArXiv*, abs/2305.14323, 2023. URL <https://arxiv.org/pdf/2305.14323.pdf>.
- [21] J. Cherian, I. Gibbs, and E. Candes. Large language model validity via enhanced conformal prediction methods. In *Advances in Neural Information Processing Systems*, volume 37, pages 114812–114842, 2024.
- [22] J. J. Cherian, I. Gibbs, and E. Candès. Large language model validity via enhanced conformal prediction methods. *ArXiv*, abs/2406.09714, 2024. URL <https://api.semanticscholar.org/CorpusId:270521658>.
- [23] V. Chernozhukov, K. Wuthrich, and Y. Zhu. Exact and robust conformal inference methods for predictive machine learning with dependent data. In *Proceedings of the 31st Conference On Learning Theory*, 2018.
- [24] A. Comas, A. Chattopadhyay, F. Formosa, C. Liu, O. Camps, and R. Vidal. Incode: Interpretable compressed descriptions for image generation. In *The Thirteenth International Conference on Learning Representations*, 2025.
- [25] A. H. Correia, F. V. Massoli, C. Louizos, and A. Behboodi. An information theoretic perspective on conformal prediction. *arXiv preprint arXiv:2405.02140*, 2024.
- [26] C. Cortes, A. Mao, C. Mohri, M. Mohri, and Y. Zhong. Cardinality-aware set prediction and top- $k$  classification. *arXiv preprint arXiv:2407.07140*, 2024.
- [27] I. C. Covert, W. Qiu, M. Lu, N. Y. Kim, N. J. White, and S.-I. Lee. Learning to maximize mutual information for dynamic feature selection. In *International Conference on Machine Learning*, pages 6424–6447. PMLR, 2023.
- [28] S. Dasgupta. Analysis of a greedy active learning strategy. *Advances in Neural Information Processing Systems*, 17, 2004.
- [29] G. Detommaso, M. Bertran, R. Fogliato, and A. Roth. Multicalibration for confidence scoring in LLMs. *arXiv preprint arXiv:2404.04689*, 2024.
- [30] G. S. Dhillon, G. Deligiannidis, and T. Rainforth. On the expected size of conformal prediction sets. In *International Conference on Artificial Intelligence and Statistics*, pages 1549–1557. PMLR, 2024.
- [31] R. Dunn, L. Wasserman, and A. Ramdas. Distribution-free prediction sets for two-layer hierarchical models. *Journal of the American Statistical Association*, pages 1–12, 2022.
- [32] B.-S. Einbinder, Y. Romano, M. Sesia, and Y. Zhou. Training uncertainty-aware classifiers with conformalized deep learning. *Advances in Neural Information Processing Systems*, 2022.
- [33] S. Feldman, L. Ringel, S. Bates, and Y. Romano. Achieving risk control in online learning settings. *Trans. Mach. Learn. Res.*, 2023, 2022. URL <https://arxiv.org/pdf/2205.09095.pdf>.
- [34] O. F’eron, J. Josse, Y. Goude, M. Zaffran, and A. Dieuleveut. Adaptive conformal predictions for time series. In *International Conference on Machine Learning*, 2022. URL <https://api.semanticscholar.org/CorpusId:246863519>.
- [35] D. Geman and B. Jedynak. An active testing model for tracking roads in satellite images. *IEEE Transactions on Pattern Analysis and Machine Intelligence*, 18(1):1–14, 1996.

- [36] J. Geng, F. Cai, Y. Wang, H. Koepl, P. Nakov, and I. Gurevych. A survey of confidence estimation and calibration in large language models. In *North American Chapter of the Association for Computational Linguistics: Human Language Technologies*, pages 6577–6595, 2024.
- [37] I. Gibbs and E. Candès. Adaptive conformal inference under distribution shift. *ArXiv*, abs/2106.00170, 2021. URL <https://api.semanticscholar.org/CorpusId:235266057>.
- [38] I. Gibbs and E. Candès. Conformal inference for online prediction with arbitrary distribution shifts. *J. Mach. Learn. Res.*, 25:162:1–162:36, 2022. URL <https://api.semanticscholar.org/CorpusId:251622480>.
- [39] A. Grattafiori, A. Dubey, A. Jauhri, A. Pandey, A. Kadian, A. Al-Dahle, A. Letman, A. Mathur, A. Schelten, A. Vaughan, et al. The llama 3 herd of models. *arXiv preprint arXiv:2407.21783*, 2024.
- [40] L. Guan. A conformal test of linear models via permutation-augmented regressions. *arXiv preprint arXiv:2309.05482*, 2023.
- [41] L. Guan. Localized conformal prediction: A generalized inference framework for conformal prediction. *Biometrika*, 110(1):33–50, 2023.
- [42] L. Guan and R. Tibshirani. Prediction and outlier detection in classification problems. *Journal of the Royal Statistical Society Series B: Statistical Methodology*, 84(2):524–546, 2022.
- [43] A. Holtzman, J. Buys, L. Du, M. Forbes, and Y. Choi. The curious case of neural text degeneration. *arXiv preprint arXiv:1904.09751*, 2019.
- [44] B. Hou, Y. Liu, K. Qian, J. Andreas, S. Chang, and Y. Zhang. Decomposing uncertainty for large language models through input clarification ensembling. *ArXiv*, abs/2311.08718, 2023. URL <https://api.semanticscholar.org/CorpusId:265213190>.
- [45] Z. Hu, C. Liu, X. Feng, Y. Zhao, S.-K. Ng, A. T. Luu, J. He, P. W. Koh, and B. Hooi. Uncertainty of Thoughts: Uncertainty-aware planning enhances information seeking in large language models. *arXiv preprint arXiv:2402.03271*, 2024.
- [46] Z. Huang, S. Rossi, R. Yuan, and T. Hannagan. From predictions to confidence intervals: an empirical study of conformal prediction methods for in-context learning. In *unknown*, 2025. URL <https://api.semanticscholar.org/CorpusId:277994329>.
- [47] E. Jahangiri, E. Yörük, R. Vidal, L. Younes, and D. Geman. Information Pursuit: A Bayesian framework for sequential scene parsing. *arXiv preprint arXiv:1701.02343*, 2017.
- [48] P. Jiang, J. Rayan, S. P. Dow, and H. Xia. Graphologue: Exploring large language model responses with interactive diagrams. In *Proceedings of the 36th Annual ACM Symposium on User Interface Software and Technology*, 2023.
- [49] D. Jin, E. Pan, N. Oufattole, W.-H. Weng, H. Fang, and P. Szolovits. What disease does this patient have. *A Large-scale Open Domain Question Answering Dataset from Medical Exams. arXiv [cs. CL]*, 2020.
- [50] Q. Jin, B. Dhingra, Z. Liu, W. W. Cohen, and X. Lu. Pubmedqa: A dataset for biomedical research question answering. *arXiv preprint arXiv:1909.06146*, 2019.
- [51] S. Kadavath, T. Conerly, A. Askell, T. Henighan, D. Drain, E. Perez, N. Schiefer, Z. Hatfield-Dodds, N. DasSarma, E. Tran-Johnson, et al. Language models (mostly) know what they know. *arXiv preprint arXiv:2207.05221*, 2022.
- [52] R. Kaur, S. Jha, A. Roy, S. Park, E. Dobriban, O. Sokolsky, and I. Lee. iDECODE: In-distribution equivariance for conformal out-of-distribution detection. In *Proceedings of the AAAI Conference on Artificial Intelligence*, 2022.

- [53] R. Kaur, C. Samplawski, A. D. Cobb, A. Roy, B. Matejek, M. Acharya, D. Elenius, A. M. Berenbeim, J. Pavlik, N. D. Bastian, and S. Jha. Addressing uncertainty in llms to enhance reliability in generative ai. *ArXiv*, abs/2411.02381, 2024. URL <https://api.semanticscholar.org/CorpusId:273822044>.
- [54] S. Kiyani, G. J. Pappas, and H. Hassani. Length optimization in conformal prediction. In *Advances in Neural Information Processing Systems*, volume 37, pages 99519–99563, 2024.
- [55] C. Koch, C. Strassle, and L.-Y. Tan. Superconstant inapproximability of decision tree learning. *Proceedings of Machine Learning Research* vol, 196:1–32, 2024.
- [56] B. Kumar, C. Lu, G. Gupta, A. Palepu, D. Bellamy, R. Raskar, and A. Beam. Conformal prediction with large language models for multi-choice question answering. *arXiv preprint arXiv:2305.18404*, 2023.
- [57] B. Kumar, C.-C. Lu, G. Gupta, A. Palepu, D. R. Bellamy, R. Raskar, and A. Beam. Conformal prediction with large language models for multi-choice question answering. *ArXiv*, abs/2305.18404, 2023. URL <https://api.semanticscholar.org/CorpusId:258967849>.
- [58] P. Laban, H. Hayashi, Y. Zhou, and J. Neville. Llms get lost in multi-turn conversation. *arXiv preprint arXiv:2505.06120*, 2025.
- [59] H. Laurent and R. L. Rivest. Constructing optimal binary decision trees is np-complete. *Information processing letters*, 5(1):15–17, 1976.
- [60] J. Lei and L. Wasserman. Distribution-free prediction bands for non-parametric regression. *Journal of the Royal Statistical Society: Series B (Statistical Methodology)*, 76(1):71–96, 2014.
- [61] J. Lei, J. Robins, and L. Wasserman. Distribution-free prediction sets. *Journal of the American Statistical Association*, 108(501):278–287, 2013.
- [62] J. Lei, A. Rinaldo, and L. Wasserman. A conformal prediction approach to explore functional data. *Annals of Mathematics and Artificial Intelligence*, 74(1):29–43, 2015.
- [63] J. Lei, M. G’Sell, A. Rinaldo, R. J. Tibshirani, and L. Wasserman. Distribution-free predictive inference for regression. *Journal of the American Statistical Association*, 113(523):1094–1111, 2018.
- [64] S. Li, X. Ji, E. Dobriban, O. Sokolsky, and I. Lee. PAC-Wrap: Semi-supervised pac anomaly detection. In *Proceedings of the 28th ACM SIGKDD Conference on Knowledge Discovery and Data Mining*, 2022.
- [65] S. Li, V. Balachandran, S. Feng, J. Ilgen, E. Pierson, P. W. W. Koh, and Y. Tsvetkov. MediQ: Question-asking llms and a benchmark for reliable interactive clinical reasoning. *Advances in Neural Information Processing Systems*, 37:28858–28888, 2024.
- [66] Y. Li, X. Shen, X. Yao, X. Ding, Y. Miao, R. Krishnan, and R. Padman. Beyond single-turn: A survey on multi-turn interactions with large language models. *arXiv preprint arXiv:2504.04717*, 2025.
- [67] Z. Liang, Y. Zhou, and M. Sesia. Conformal inference is (almost) free for neural networks trained with early stopping. In *International Conference on Machine Learning*, 2023.
- [68] Z. Liang, M. Sesia, and W. Sun. Integrative conformal p-values for out-of-distribution testing with labelled outliers. *Journal of the Royal Statistical Society Series B: Statistical Methodology*, page qkad138, 01 2024.
- [69] Z. Lin, S. Trivedi, and J. Sun. Generating with confidence: Uncertainty quantification for black-box large language models. *Trans. Mach. Learn. Res.*, 2024, 2023. URL <https://api.semanticscholar.org/CorpusId:258967487>.
- [70] C. Ling, X. Zhao, X. Zhang, W. Cheng, Y. Liu, Y. Sun, M. Oishi, T. Osaki, K. Matsuda, J. Ji, et al. Uncertainty quantification for in-context learning of large language models. *arXiv preprint arXiv:2402.10189*, 2024.

- [71] O. Liu, D. Fu, D. Yogatama, and W. Neiswanger. DeLLMa: Decision making under uncertainty with large language models. *arXiv preprint arXiv:2402.02392*, 2024.
- [72] S. Luttrell. The use of transinformation in the design of data sampling schemes for inverse problems. *Inverse Problems*, 1(3):199, 1985.
- [73] Q. Lyu, K. Shridhar, C. Malaviya, L. Zhang, Y. Elazar, N. Tandon, M. Apidianaki, M. Sachan, and C. Callison-Burch. Calibrating large language models with sample consistency. In *Proceedings of the AAAI Conference on Artificial Intelligence*, volume 39, pages 19260–19268, 2025.
- [74] D. J. MacKay. *Information theory, inference and learning algorithms*. Cambridge university press, 2003.
- [75] C. Mohri and T. Hashimoto. Language models with conformal factuality guarantees. In *International Conference on Machine Learning*, pages 36029–36047. PMLR, 2024.
- [76] C. Mohri and T. Hashimoto. Language models with conformal factuality guarantees. *ArXiv*, abs/2402.10978, 2024. URL <https://api.semanticscholar.org/CorpusId:267750963>.
- [77] U. K. Müller and M. W. Watson. Measuring uncertainty about long-run predictions. *Review of Economic Studies*, 83(4):1711–1740, 2016.
- [78] H. Naveed, A. U. Khan, S. Qiu, M. Saqib, S. Anwar, M. Usman, N. Akhtar, N. Barnes, and A. Mian. A comprehensive overview of large language models. *arXiv preprint arXiv:2307.06435*, 2023.
- [79] D. Noever and F. McKee. Chatbots as problem solvers: Playing twenty questions with role reversals. *arXiv preprint arXiv:2301.01743*, 2023.
- [80] A. Pal, L. K. Umapathi, and M. Sankarasubbu. Medmcqa: A large-scale multi-subject multi-choice dataset for medical domain question answering. In *Conference on health, inference, and learning*, pages 248–260. PMLR, 2022.
- [81] A. Panchenko, E. Fadeeva, M. Panov, D. Vasilev, T. Baldwin, A. Tsvigun, K. Fedyanin, A. Shelmanov, E. Goncharova, S. Petrakov, A. Vazhentsev, and R. Vashurin. Lm-polygraph: Uncertainty estimation for language models. *ArXiv*, abs/2311.07383, 2023. URL <https://api.semanticscholar.org/CorpusId:265149591>.
- [82] J.-C. Pang, H.-B. Fan, P. Wang, J.-H. Xiao, N. Tang, S.-H. Yang, C. Jia, S.-J. Huang, and Y. Yu. Empowering language models with active inquiry for deeper understanding. *arXiv preprint arXiv:2402.03719*, 2024.
- [83] H. Papadopoulos, K. Proedrou, V. Vovk, and A. Gammerman. Inductive confidence machines for regression. In *European Conference on Machine Learning*, pages 345–356. Springer, 2002.
- [84] S. Park, O. Bastani, N. Matni, and I. Lee. PAC confidence sets for deep neural networks via calibrated prediction. In *International Conference on Learning Representations*, 2020.
- [85] S. Park, E. Dobriban, I. Lee, and O. Bastani. PAC prediction sets under covariate shift. In *International Conference on Learning Representations*, 2022.
- [86] S. Park, E. Dobriban, I. Lee, and O. Bastani. PAC prediction sets for meta-learning. In *Advances in Neural Information Processing Systems*, 2022.
- [87] H. Qiu, E. Dobriban, and E. Tchetgen Tchetgen. Prediction sets adaptive to unknown covariate shift. *Journal of the Royal Statistical Society Series B: Statistical Methodology*, page qkad069, 07 2023.
- [88] V. Quach, A. Fisch, T. Schuster, A. Yala, J. Sohn, T. Jaakkola, and R. Barzilay. Conformal language modeling. *ArXiv*, abs/2306.10193, 2023. URL <https://api.semanticscholar.org/CorpusId:259203582>.



- [89] V. Quach, A. Fisch, T. Schuster, A. Yala, J. H. Sohn, T. S. Jaakkola, and R. Barzilay. Conformal language modeling. In *The Twelfth International Conference on Learning Representations*, 2024.
- [90] H. Rajabzadeh, S. Wang, H. J. Kwon, and B. Liu. Multimodal multi-hop question answering through a conversation between tools and efficiently finetuned large language models. *arXiv preprint arXiv:2309.08922*, 2023.
- [91] A. Z. Ren, A. Dixit, A. Bodrova, S. Singh, S. Tu, N. Brown, P. Xu, L. Takayama, F. Xia, J. Varley, Z. Xu, D. Sadigh, A. Zeng, and A. Majumdar. Robots that ask for help: Uncertainty alignment for large language model planners. *ArXiv*, abs/2307.01928, 2023. URL <https://arxiv.org/pdf/2307.01928.pdf>.
- [92] A. Z. Ren, J. Clark, A. Dixit, M. Itkina, A. Majumdar, and D. Sadigh. Explore until confident: Efficient exploration for embodied question answering. *arXiv preprint arXiv:2403.15941*, 2024.
- [93] J. Robinson and D. Wingate. Leveraging large language models for multiple choice question answering. In *International Conference on Learning Representations*, 2023.
- [94] Y. Romano, M. Sesia, and E. Candes. Classification with valid and adaptive coverage. *Advances in Neural Information Processing Systems*, 2020.
- [95] M. Sadtler, J. Lei, and L. Wasserman. Least ambiguous set-valued classifiers with bounded error levels. *Journal of the American Statistical Association*, 114(525):223–234, 2019.
- [96] C. Saunders, A. Gammerman, and V. Vovk. Transduction with confidence and credibility. In *Sixteenth International Joint Conference on Artificial Intelligence*, pages 722–726, 1999.
- [97] H. Scheffe and J. W. Tukey. Non-parametric estimation. I. Validation of order statistics. *The Annals of Mathematical Statistics*, 16(2):187–192, 1945.
- [98] T. Schuster, A. Fisch, J. Gupta, M. Dehghani, D. Bahri, V. Q. Tran, Y. Tay, and D. Metzler. Confident adaptive language modeling. *ArXiv*, abs/2207.07061, 2022. URL <https://arxiv.org/pdf/2207.07061.pdf>.
- [99] M. Sesia, S. Favaro, and E. Dobriban. Conformal frequency estimation using discrete sketched data with coverage for distinct queries. *Journal of Machine Learning Research*, 24(348):1–80, 2023.
- [100] H. Shahrokhi, D. Roy, Y. Yan, V. Arnaudova, and J. R. Doppa. Conformal prediction sets for deep generative models via reduction to conformal regression. *ArXiv*, abs/2503.10512, 2025. URL <https://api.semanticscholar.org/CorpusId:276961510>.
- [101] C. E. Shannon. A mathematical theory of communication. *The Bell system technical journal*, 27(3):379–423, 1948.
- [102] C. E. Shannon. A mathematical theory of communication. *ACM SIGMOBILE mobile computing and communications review*, 5(1):3–55, 2001.
- [103] M. Shen, S. Das, K. Greenewald, P. Sattigeri, G. Wornell, and S. Ghosh. Thermometer: Towards universal calibration for large language models. *arXiv preprint arXiv:2403.08819*, 2024.
- [104] W. Si, S. Park, I. Lee, E. Dobriban, and O. Bastani. PAC prediction sets under label shift. In *The Twelfth International Conference on Learning Representations*, 2024.
- [105] K. Singhal, T. Tu, J. Gottweis, R. Sayres, E. Wulczyn, M. Amin, L. Hou, K. Clark, S. R. Pfohl, H. Cole-Lewis, et al. Toward expert-level medical question answering with large language models. *Nature Medicine*, pages 1–8, 2025.
- [106] J. Song, Z. Wang, H. Chen, Y. Huang, and L. Ma. Look before you leap: An exploratory study of uncertainty measurement for large language models. *ArXiv*, abs/2307.10236, 2023. URL <https://api.semanticscholar.org/CorpusId:259991714>.

- [107] C. Spiess, D. Gros, K. S. Pai, M. Pradel, M. R. I. Rabin, A. Alipour, S. Jha, P. Devanbu, and T. Ahmed. Calibration and correctness of language models for code. In *IEEE/ACM 47th International Conference on Software Engineering*, pages 495–507. IEEE Computer Society, 2025.
- [108] J. Su, J. Luo, H. Wang, and L. Cheng. Api is enough: Conformal prediction for large language models without logit-access. In *Conference on Empirical Methods in Natural Language Processing*, 2024. URL <https://api.semanticscholar.org/CorpusId:268230867>.
- [109] H. Suri, Q. Zhang, W. Huo, Y. Liu, and C. Guan. Mediaqa: A question answering dataset on medical dialogues. *arXiv preprint arXiv:2108.08074*, 2021.
- [110] J. H. Szabadváry. Beyond conformal predictors: Adaptive conformal inference with confidence predictors. *arXiv preprint arXiv:2409.15548*, 2024.
- [111] S. Tayebati, D. Kumar, N. Darabi, D. Jayasuriya, R. Krishnan, and A. R. Trivedi. Learning conformal abstention policies for adaptive risk management in large language and vision-language models. *ArXiv*, abs/2502.06884, 2025. URL <https://arxiv.org/pdf/2502.06884.pdf>.
- [112] K. Tian, E. Mitchell, A. Zhou, A. Sharma, R. Rafailov, H. Yao, C. Finn, and C. D. Manning. Just ask for calibration: Strategies for eliciting calibrated confidence scores from language models fine-tuned with human feedback. *arXiv preprint arXiv:2305.14975*, 2023.
- [113] J. W. Tukey. Non-parametric estimation II. Statistically equivalent blocks and tolerance regions—the continuous case. *The Annals of Mathematical Statistics*, 18(4):529–539, 1947.
- [114] J. W. Tukey. Nonparametric estimation, III. Statistically equivalent blocks and multivariate tolerance regions—the discontinuous case. *The Annals of Mathematical Statistics*, 19(1):30–39, 1948.
- [115] D. T. Ulmer, M. Gubri, H. Lee, S. Yun, and S. J. Oh. Calibrating large language models using their generations only. In *Proceedings of the 62nd Annual Meeting of the Association for Computational Linguistics*, pages 15440–15459. Association for Computational Linguistics, 2024.
- [116] V. Vovk. Conditional validity of inductive conformal predictors. In *Asian Conference on Machine Learning*, pages 475–490. PMLR, 2012.
- [117] V. Vovk, A. Gammerman, and C. Saunders. Machine-learning applications of algorithmic randomness. In *International Conference on Machine Learning*, 1999.
- [118] V. Vovk, A. Gammerman, and G. Shafer. *Algorithmic Learning in a Random World*. Springer Science & Business Media, 2005.
- [119] A. Wald. An extension of Wilks’ method for setting tolerance limits. *The Annals of Mathematical Statistics*, 14(1):45–55, 1943.
- [120] B. Wang, X. Yue, and H. Sun. Can ChatGPT defend its belief in truth? evaluating LLM reasoning via debate. In *Conference on Empirical Methods in Natural Language Processing*, 2023.
- [121] K. Wang, F. Duan, S. Wang, P. Li, Y. Xian, C. Yin, W. Rong, and Z. Xiong. Knowledge-Driven CoT: Exploring faithful reasoning in LLMs for knowledge-intensive question answering. *arXiv preprint arXiv:2308.13259*, 2023.
- [122] P. Wang, L. Li, L. Chen, Z. Cai, D. Zhu, B. Lin, Y. Cao, Q. Liu, T. Liu, and Z. Sui. Large language models are not fair evaluators. *arXiv preprint arXiv:2305.17926*, 2023.
- [123] Q. Wang, T. Geng, Z. Wang, T. Wang, B. Fu, and F. Zheng. Sample then identify: A general framework for risk control and assessment in multimodal large language models. *ArXiv*, abs/2410.08174, 2024. URL <https://api.semanticscholar.org/CorpusId:273233940>.

- [124] X. Wang and R. J. Hyndman. Online conformal inference for multi-step time series forecasting. *arXiv preprint arXiv:2410.13115*, 2024.
- [125] Z. Wang, Q. Wang, Y. Zhang, T. Chen, X. Zhu, X. Shi, and K. Xu. Sconu: Selective conformal uncertainty in large language models. In *unknown*, 2025. URL <https://api.semanticscholar.org/CorpusId:277954950>.
- [126] J. Wei, Y. Tay, R. Bommasani, C. Raffel, B. Zoph, S. Borgeaud, D. Yogatama, M. Bosma, D. Zhou, D. Metzler, et al. Emergent abilities of large language models. *arXiv preprint arXiv:2206.07682*, 2022.
- [127] S. S. Wilks. Determination of sample sizes for setting tolerance limits. *The Annals of Mathematical Statistics*, 12(1):91–96, 1941.
- [128] S. Wu, X. Shen, and R. Xia. A new dialogue response generation agent for large language models by asking questions to detect user’s intentions. *arXiv preprint arXiv:2310.03293*, 2023.
- [129] H. Xi, K. Liu, H. Zeng, W. Sun, and H. Wei. Robust online conformal prediction under uniform label noise. *ArXiv*, abs/2501.18363, 2025. URL <https://api.semanticscholar.org/CorpusId:275994111>.
- [130] Y. Xian, C. H. Lampert, B. Schiele, and Z. Akata. Zero-shot learning—a comprehensive evaluation of the good, the bad and the ugly. *IEEE transactions on pattern analysis and machine intelligence*, 41(9):2251–2265, 2018.
- [131] G. Xiong, J. Bao, and W. Zhao. Interactive-KBQA: Multi-turn interactions for knowledge base question answering with large language models. In *Annual Meeting of the Association for Computational Linguistics*, 2024.
- [132] Z. Yang, P. Qi, S. Zhang, Y. Bengio, W. W. Cohen, R. Salakhutdinov, and C. D. Manning. HotpotQA: A dataset for diverse, explainable multi-hop question answering. *arXiv preprint arXiv:1809.09600*, 2018.
- [133] S. Yao, J. Zhao, D. Yu, N. Du, I. Shafran, K. Narasimhan, and Y. Cao. ReAct: Synergizing reasoning and acting in language models. In *International Conference on Learning Representations*, 2023.
- [134] F. Ye, M. Yang, J. Pang, L. Wang, D. Wong, E. Yilmaz, S. Shi, and Z. Tu. Benchmarking LLMs via uncertainty quantification. In *Advances in Neural Information Processing Systems*, volume 37, pages 15356–15385, 2024.
- [135] F. Ye, M. Yang, J. Pang, L. Wang, D. F. Wong, E. Yilmaz, S. Shi, and Z. Tu. Benchmarking llms via uncertainty quantification. *ArXiv*, abs/2401.12794, 2024. URL <https://arxiv.org/pdf/2401.12794.pdf>.
- [136] M. Zhang, M. Huang, R. Shi, L. Guo, C. Peng, P. Yan, Y. Zhou, and X. Qiu. Calibrating the confidence of large language models by eliciting fidelity. In *Conference on Empirical Methods in Natural Language Processing*, pages 2959–2979, 2024.
- [137] Y. Zhang, J. Lu, and N. Jaitly. Probing the multi-turn planning capabilities of LLMs via 20 question games. *arXiv preprint arXiv:2310.01468*, 2023.
- [138] T. Zhao, E. Wallace, S. Feng, D. Klein, and S. Singh. Calibrate before use: Improving few-shot performance of language models. In *International Conference on Machine Learning*, pages 12697–12706, 2021.
- [139] A. X. Zheng, I. Rish, and A. Beygelzimer. Efficient test selection in active diagnosis via entropy approximation. *arXiv preprint arXiv:1207.1418*, 2012.
- [140] Z. Zhi, C. Feng, A. Daneshmend, M. Orlu, A. Demosthenous, L. Yin, D. Li, Z. Liu, and M. Rodrigues. Seeing and reasoning with confidence: Supercharging multimodal llms with an uncertainty-aware agentic framework. *ArXiv*, abs/2503.08308, 2025. URL <https://arxiv.org/pdf/2503.08308.pdf>.



- 762 [141] H. Zhou, X. Wan, L. Proleev, D. Mincu, J. Chen, K. A. Heller, and S. Roy. Batch calibra-  
763 tion: Rethinking calibration for in-context learning and prompt engineering. In *The Twelfth*  
764 *International Conference on Learning Representations*, 2024.
- 765 [142] C. Zhu, B. Xu, Q. Wang, Y. Zhang, and Z. Mao. On the calibration of large language models  
766 and alignment. In *Conference on Empirical Methods in Natural Language Processing*, 2023.

# Appendix

## A Outline for the Appendix

- Appendix §B is the Related Work section.
- Appendix §C discusses the limitations of this work.
- Appendix §D discusses broader impacts.
- Appendix §E provides additional results, which include results for other models, etc.
- Appendix §F provides further ablation studies.
- Appendix §G provides implementation details including hyperparameters.
- Appendix §H provides the prompts used for generating responses with LLMs.
- Appendix §I is the pseudocode for the different algorithms including IP, C-IP and DP.
- Appendix §J provides additional examples of query-answer chains.
- Appendix §K provides examples of sampled queries in open query set settings.

## B Related Work

### B.1 Large Language Models and Interactive Settings

**Information-Seeking Environments of LLMs.** In information seeking environments, LLM agents seek information by constructing well-design prompts and designing proper rewards with reinforcement learning (RL) to encourage proper information-seeking behavior. Prompting-based methods [1, 82, 120, 120, 121, 128] typically involve LLM agents interacting and solving a task together. Advanced techniques include building graphs [48], using tools such as APIs and databases [90, 131], and leveraging Chain-of-Thought (CoT) methods [20, 45, 70, 121] to ensure interaction is valid and improve performance. However, they do not explicit attempt to minimize the average number of interactions needed. On the other hand, RL-based methods such as ReAct and DeLLMa [71, 133] usually involves designing a good reward or utility function (can be non-entropy-based) that balances between exploration and exploitation, which our method can be classified in the pure exploitation regime. By and large, prompting-based methods and RL-based methods consider a different strategy that is not as explicit as our work here, and are not always plug-and-play to the interactive question-answering setting.

**Interactive Medical Question Answering Setting.** As our motivation (see Fig. 1), interactive medical question answering is one potentially impactful application of our work. While there are many existing benchmarks of medical question answering on LLMs such as MedQA [49], MedQuAD [10], MedMCQA [80], PubMedQA [50], they mostly focus on single-turn one-input-one-response type interaction. Instead, we focus on a more recently trending setting of interactive medical question answering and diagnosis. Datasets in this setting are still rare, with the two being the WMeDiaQA [109], which is a chinese interactive dataset, and the MediQ [65]. Importantly furthermore, it has been shown that LLMs in interactive human-LLM medical/clinical settings are subpar: as shown in Bean et al. [9], they perform nearly 30% worse than LLMs acting alone. Similarly, Li et al. [65] has also shown that directly applying LLMs for interactive settings perform worse without additional guidance to the iterative process.

To summarize, the research question of why LLMs in a multi-turn, interactive environments perform worse than single-turn use-cases remains active and highly relevant in today’s use-cases [58, 65]. Our work seeks to provide some answer via the lens of information gain.

### B.2 Uncertainty Quantification

**Predictive Inference and Conformal Prediction.** Our proposed formulation uses entropy and mutual information, which are fundamental measurements of uncertainty that dates back to Shannon’s Information Theory [74, 101, 102] and predictive inference [97, 113, 114, 119, 127]. Amongst existing methods for predictive inference, conformal prediction has gained popularity due to its flexibility for constructing prediction intervals with a marginal coverage guarantee under the exchangeability

of data points. While distribution-free inference and the conformal prediction framework have been extensively studied in recent works, with many going beyond standard assumptions [see, e.g., 5, 8, 23, 31, 32, 40–42, 52, 60–64, 67, 68, 83–87, 94, 96, 99, 104, 116–118], few has formalized the framework in the interactive and iterative setting. Arguably, the most similar setting is the online or adaptive setting [33, 34, 37, 38, 110, 124, 129], where distribution shift exists and the exchangeability assumption no longer holds. This line of research is different from our work in two major ways: 1) they focus on an online setting where data points are sequentially provided, such as time series, with assumptions such as affine transformations for the distribution shifts. In contrast, our work focuses on an interactive question answering setting that depends on multiple factors, such as the query set  $\mathcal{Q}$  (open and closed setting), the query answers  $q_{1:k}(x^{\text{obs}})$ , and the target distribution  $Y$ ; 2) they focus on providing tighter risk control in an online setting, whereas our work focuses on how to use uncertainty measured from prediction sets to drive decision making. While we agree adaptive conformal prediction and sequential information gain via conformal prediction draw some resemblances, we reserve the research of their precise relationship in a future work.

**Uncertainty Quantification for LLMs.** Methods for quantifying uncertainty in LLMs largely revolve around controlling the quality and ensuring correctness of LLM generations, either via minimizing entropy with a constructed distribution [13, 18, 44, 69, 81, 106, 135] or leveraging conformal prediction [22, 46, 53, 57, 76, 88, 91, 98, 100, 108, 111, 123, 125, 135, 140]. Here we highlight the ones that are highly relevant to our method: Ling et al. [70], which considers the problem of uncertainty quantification in the context of in-context learning. Similar to our IP baseline, it also measures uncertainty by computing the entropy of distributions estimated from the token distribution. On the other hand, Kumar et al. [56] applies conformal prediction to question answering with multiple choices. Their method also extracts probability of each choice by obtaining the logits of each answer token, but their setting is single-turn rather than multi-turn. As aforementioned, there exist multiple methods to measure uncertainty in LLMs, and we reserve how different choices might affect the interactive question-answering process in this paper’s setting for future work.

**Uncertainty Quantification in Interactive Environments.** The two closely related works are Uncertainty of Thought (UoT) [45] and EQA work by Ren et al. [92]. UoT is in the setting of efficient reasoning for LLMs, in which the method formulates its exploration as a tree. At each iteration, UoT explores multiple branches of solutions with up to a depth at three, then evaluates the accumulated information gain at the leaf node, ultimately choosing the leaf with the highest information gain. Compared to C-IP, UoT considers only binary query-answers, considers accumulated rewards, and computes entropy directly, whereas C-IP considers free-text query answers, immediate rewards at each iteration, and utilizes calibrated information. On the other hand, Ren et al. [92] is positioned the setting of robotics, where the Vision-Language Model (VLM) agent has to answer a question by exploring different parts of the room. While this work also uses conformal inference and prediction set size to estimate confidence, the connection to entropy was not presented. It also differs from our language-domain setting by using a custom, domain-specific score function called “relevance” rather than the probability score as in the case of C-IP.

### B.3 Sequential Information Gain via Information Pursuit

**Previous Iterations of IP.** Information Pursuit framework was first proposed by Jahangiri et al. [47] as an active-testing algorithm for scene parsing. Later learning-based approaches, such as generative approach [14] and variational approaches [15, 17, 24], require having access to the data distribution and learning a model to estimate the posterior distribution. Our work differs from all of the above in multiple aspects: 1) learning-based approaches of IP largely focus on computer vision tasks such as image classification and image generation, whereas our work focuses on the language domain; 2) their setting often provides sufficient samples that allows for a good estimation of the posterior distribution  $\mathbb{P}(Y \mid \mathcal{H}_k)$ , which enables efficient implementation with faster and scalable inference and make it applicable to large-scale tasks. In contrast, LLMs may not provide good estimates of the posterior distribution because they are pretrained models; 3) IP has mostly been written as an interpretability framework rather than a framework for interactive guidance. It’s unclear yet how IP will perform in settings where multiple off-the-shelf models are involved; 4) query set in previous iterations of IP is always a pre-determined fixed set, whereas our work explores both the closed setting and an open generation setting where queries are obtained from LLMs iteratively; and 5) query answers in previous iterations of IP are either concept-based or raw features such as pixel-values. All the reasons above provide strong motivation to our current work.

870 **Efficient Sampling.** The challenge of efficiently obtaining samples for estimating mutual information  
871 often arises in IP. The generative approach [14] learns a joint distribution of  $\mathbb{P}(Q(X), Y)$ , then uses  
872 Langevin Dynamics to compute the conditional distribution. Alternative, V-IP [15], the current  
873 state-of-the-art implementation of IP, learns a query selection function  $g$  parameterized by a neural  
874 network  $g_\theta$ , which also requires efficient sampling of random histories. In this work, our uniform  
875 parameterization is inspired from V-IP, whereas our sampling via LLM prompting provides a new  
876 domain-specific way to sample query-answer chains.

## 877 C Limitations

878 Our work explores the areas of using LLMs interactively and using information gain to obtain  
879 further information. While efficient, it still requires sampling in order to estimate quantities such  
880 as conditional entropy and prediction sets. One potential exploration is to find ways to estimate  
881 posteriors via a single pass, for example, via tractable approximations. Moreover, the success of our  
882 method also relies on LLMs that can follow instructions well, which today’s LLMs are still not fully  
883 reliable yet and instruction-following in general is still an active area of research. Furthermore, as  
884 stated in our Section 6, we are not fully leveraging the potential of conformal prediction as we are  
885 only using it as a measure of uncertainty but not using it as means to control risk and evaluate the  
886 correctness of the overall query-answer chains. We reserve these interesting directions for future  
887 work.

## 888 D Broader Impacts

889 Our work studies the setting of using LLMs interactively, where information is not provided all at once  
890 but sequentially depending on the previous responses of LLMs. While currently understudied, this  
891 research direction aligns closely with how human-human or human-LLM behaves in the real world,  
892 and potentially describes the predominant way of how human would use LLMs as the capabilities of  
893 LLMs grows. Hence, it is crucial to understand the behavior through careful mathematical formulation  
894 and experimental designs. We argue that the formulation in this work can serve as the foundational  
895 ground work for further analysis when interactively using LLMs. Our empirical study with interactive  
896 medical question answering also demonstrates potential applications of our method in real-world  
897 medical settings.

## 898 E Additional Results

### 899 E.1 20Q

900 The predictive performance of 20Q on two additional models (Qwen2.5-7B [7] and Phi-3-small [2])  
 901 are shown in Figure 6 and Figure 7, respectively. Moreover, we visualize the different thresholds  
 902 obtained from split conformal prediction in Figure 8, with thresholds for each model in each row.  
 903 We will discuss the performance of C-IP with respect to the thresholds obtained together, as they  
 904 demonstrate a picture of when C-IP would be successful and unsuccessful in guiding LLMs.

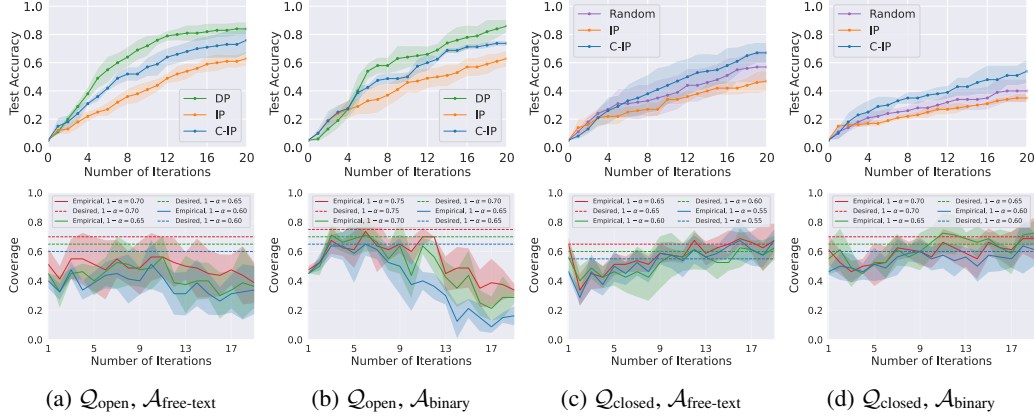

Figure 6: Predictive Performance of 20Q with Qwen-2.5-7B model.

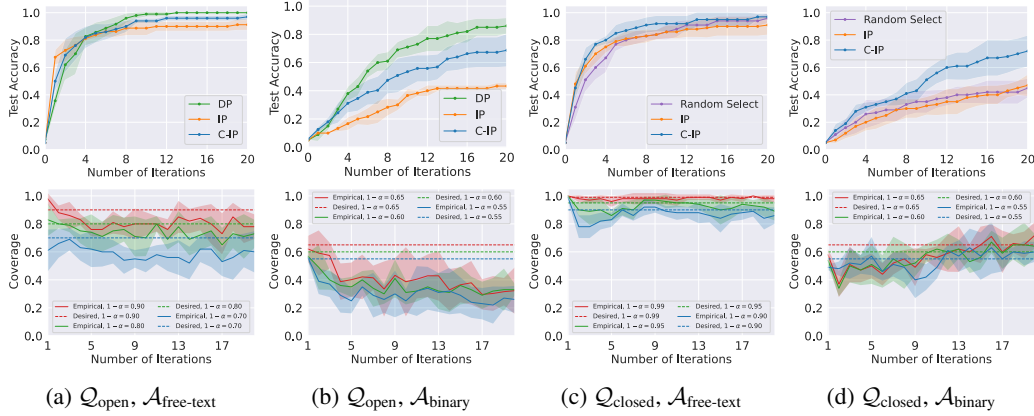

Figure 7: Predictive Performance of 20Q with Phi-3-small model.

905 **Successful Cases of C-IP.** We first discuss the setting of 20Q with closed query set  $Q_{\text{closed}}$ . It is clear  
 906 that for all three models (including Llama-3.1-8B from Figure 3), C-IP outperforms IP and random  
 907 query selection, where it is able to achieve a higher accuracy at every iteration. One sign of this  
 908 success can be attributed to the fact that our empirical marginal coverage guarantee follows closely to  
 909 the desired guarantee at each iteration.

910 Alternatively, one can attribute this success by looking at the thresholds obtained through split  
 911 conformal prediction from Figure 8. In the closed query set setting (right two columns), we observe a  
 912 progressive increase in the thresholds also as the number of iterations increase. This matches with  
 913 our intuition: in the first few iterations, the model is not confident about its prediction, hence the  
 914 threshold  $\tau$  remains small, and a large number of classes  $y$  would be in the prediction set. As the  
 915 number of iterations increase, the predictor (on average relative to the calibration set) becomes more  
 916 confident, hence the threshold  $\tau$  increases.

917 **Unsuccessful Cases of C-IP.** We now turn to the unsuccessful cases of C-IP, which largely pertains  
 918 the open query set setting for Qwen2.5-7B and Phi-3-small. We observe that C-IP in fact does not



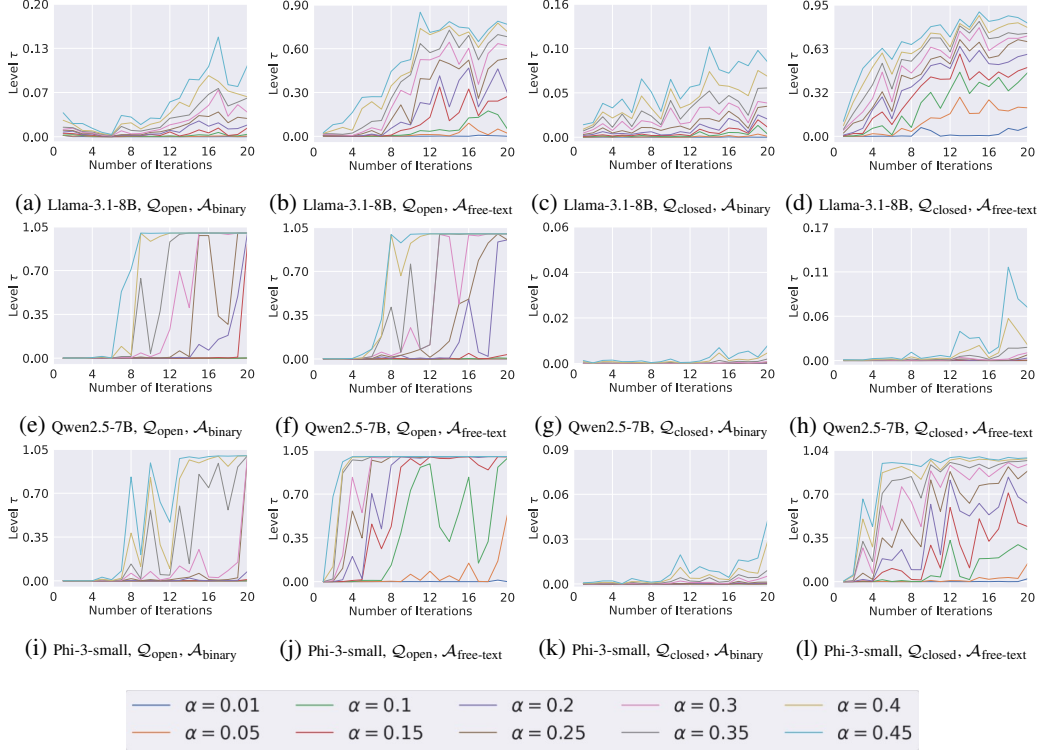

Figure 8: Thresholds obtained through split conformal prediction for 20Q. The legend below shows different colors Each color corresponds to different choices of target coverage  $\alpha$ .

outperform the DP method. To understand why, we argue it from the perspective of *meaningful calibration*.

Recall that in the open query set setting, C-IP is calibrated on query-answer chains obtained from DP. Turning to Figure 6 (a, b) and Figure 7 (a, b), we observe that the empirical coverage is below the desired coverage a majority of the iterations, a sharp contrast to successful cases of C-IP where empirical and desired coverage is mostly coincides. To explain the misalignment between the empirical coverage and desired coverage, we can also infer from Figure 8, where we observe sudden jump in the thresholds in the open query set setting for Qwen2.5-7B and Phi-3-small. From our results, we observe the following: Given Qwen2.5-7B and Phi-3-small models are relatively strong models and our task is relatively simple, it is often the case where the label is guessed correctly within a few iteration. Once the correct prediction is made, it becomes part of the history  $\mathcal{H}_k$  (e.g. “Is the animal a dolphin? Yes.”) and any new query no longer provides any meaningful information gain. This ultimately leads to an over-confident prediction for every data point, yielding an uninformative threshold. As a result, every prediction now requires a very high probability (near 1) to be an element in the prediction set. Consequently, the prediction sets cannot quantify uncertainty in a meaningful way, leading to suboptimal results.

While there exist cases where C-IP does not outperform other methods, we argue it is more interpretable than IP in that one can observe its failure modes from the thresholds obtained and empirical coverage. As discussed in our Future Work (Section §6) and Limitations (Appendix §C), this direction of obtaining the *proper* conformal coverage guarantee over distributions of natural language deserves further study, and we reserve this for future work.

**Additional Comparisons with UoT.** We provide the full comparison with UoT for Llama-3.1-8B in Table 2. Focusing on IP and C-IP, we can see that C-IP is able to outperform IP in all four settings, which aligns with our previous results regarding the predictive performance. Comparing C-IP with UoT, C-IP is able to outperform UoT in free-text query answers, but not in closed binary query answer setting. This can be explained by the design of the respective methods: C-IP relies on immediate reward (information gain) whereas UoT looks ahead, accumulates and propagates rewards up to the certain depth before selecting the next query.

As discussed previously in Section §E.1, while having binary query answers allow UoT to look forward and accumulate rewards (akin to a beam search), free-text query answers provide a much larger marginal gain over binary query answers and is a more realistic setting to consider.

Table 2: Full Comparison of C-IP with UoT reasoning, averaged across 5 runs with shaded area as standard deviation.

| Method                  | Query Set $\mathcal{Q}$ | Query Answers $\mathcal{A}$ | Avg. Len.        | Avg. Success Len. | Success Rate    |
|-------------------------|-------------------------|-----------------------------|------------------|-------------------|-----------------|
| UoT                     | open                    | binary                      | $13.57 \pm 1.69$ | $8.75 \pm 0.82$   | $0.57 \pm 0.13$ |
| IP                      | open                    | binary                      | $11.40 \pm 0.78$ | $10.48 \pm 0.98$  | $0.31 \pm 0.04$ |
| IP                      | open                    | free-text                   | $10.04 \pm 0.45$ | $9.66 \pm 0.68$   | $0.65 \pm 0.18$ |
| IP                      | closed                  | binary                      | $10.74 \pm 0.59$ | $10.98 \pm 0.86$  | $0.29 \pm 0.11$ |
| IP                      | closed                  | free-text                   | $13.81 \pm 0.16$ | $13.73 \pm 0.24$  | $0.71 \pm 0.08$ |
| C-IP ( $\alpha = 0.1$ ) | open                    | binary                      | $11.87 \pm 0.83$ | $12.12 \pm 0.26$  | $0.37 \pm 0.11$ |
| C-IP ( $\alpha = 0.1$ ) | open                    | free-text                   | $10.58 \pm 0.58$ | $10.45 \pm 0.63$  | $0.83 \pm 0.05$ |
| C-IP ( $\alpha = 0.1$ ) | closed                  | binary                      | $11.26 \pm 0.84$ | $10.58 \pm 0.61$  | $0.29 \pm 0.04$ |
| C-IP ( $\alpha = 0.1$ ) | closed                  | free-text                   | $8.87 \pm 0.31$  | $8.24 \pm 0.51$   | $0.83 \pm 0.07$ |

950 **E.2 MediQ**

951 The thresholds  $\tau$  obtained through split conformal prediction is shown in Figure 9. Similar to our  
 952 observations in the 20Q case, we observe that a useful and successful case of C-IP can be attributed  
 to having good calibration and finding meaningful thresholds.

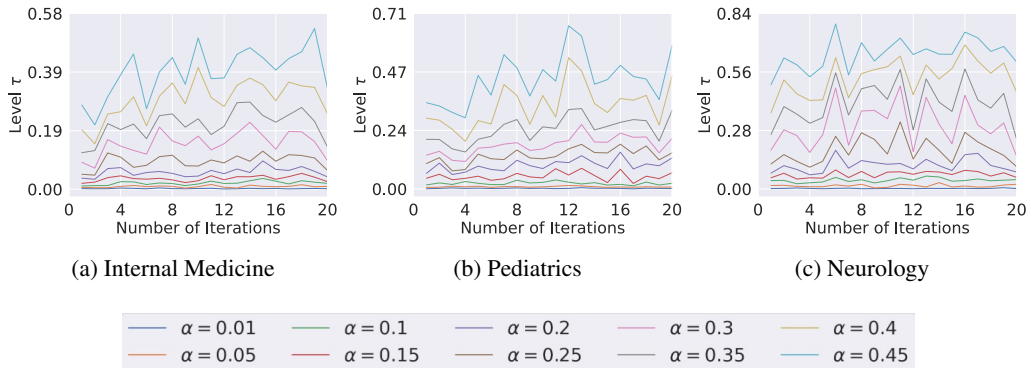

Figure 9: Thresholds obtained through split conformal prediction for MediQ. The legend below shows different colors Each color corresponds to different choices of target coverage  $\alpha$ .

953

## 954 F Ablation Studies

955 We compare predictive performance of 20Q (Figure 10) and MediQ (Figure 11). In nearly all cases,  
 956 we observe only minor differences between different levels of  $\alpha$ , which indicates C-IP is fairly robust  
 957 with the appropriate choices of  $\alpha$ .

### 958 F.1 Varying Desired Coverage

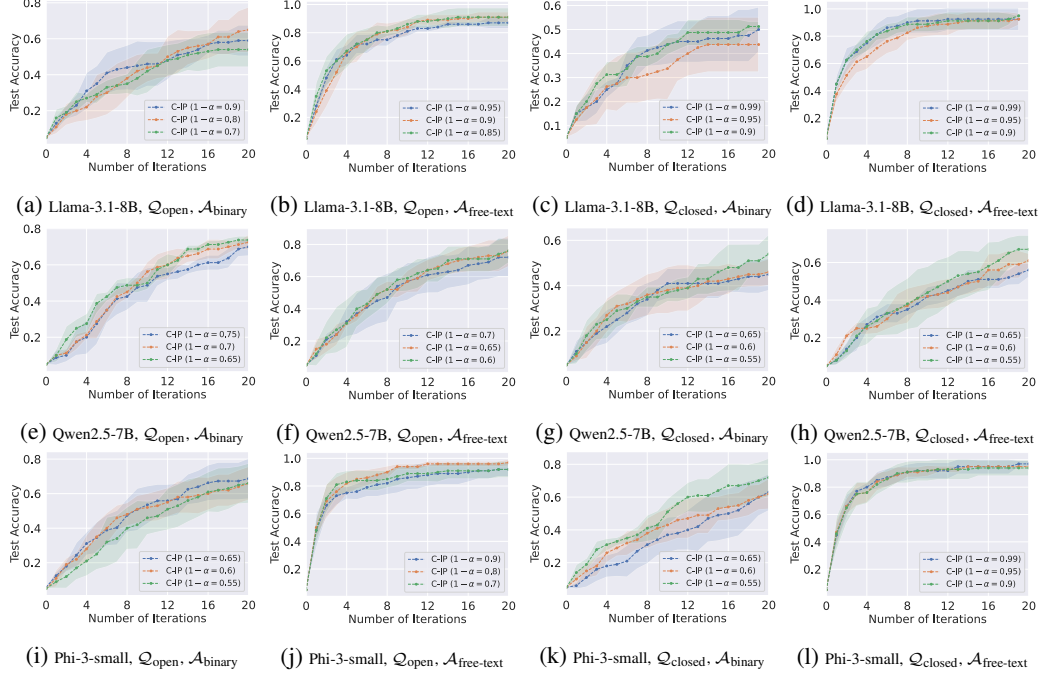

Figure 10: Predictive Performance of 20Q with different choices of  $\alpha$ .

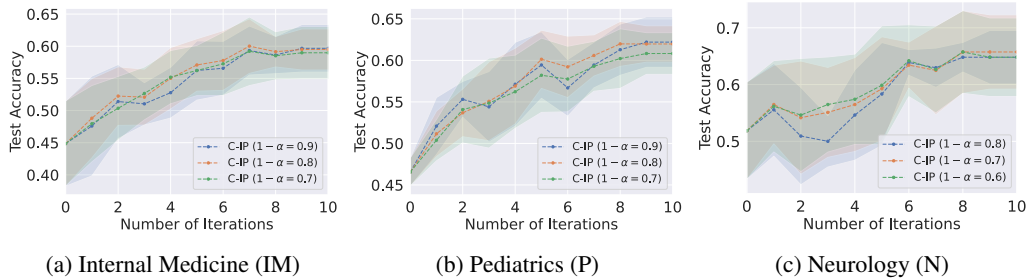

Figure 11: Predictive Performance of MediQ with different choices of  $\alpha$ .

### 959 F.2 Varying Number of Estimation Samples

960 We evaluate whether C-IP is sensitive to the number of samples  $n_{\text{est}}$  used during estimation for the  
 961 task of 20Q on Llama-3.1-8B (Figure 12). Recall that by the number of estimation samples  $n_{\text{est}}$ , we  
 962 refer to the number of samples used to estimate the upper bound (C-IP). In our ablation study for  
 963 20Q on Llama-3.1-8b with closed query set  $\mathcal{Q}_{\text{closed}}$ , binary query answers  $\mathcal{A}_{\text{binary}}$  and open query  
 964 set  $\mathcal{Q}_{\text{open}}$ , binary query answers  $\mathcal{A}_{\text{binary}}$ , we find that the number of samples do have impact on the  
 965 performance. While one would expect the more is better, but we find that using  $n_{\text{est}} \in \{1, 2, 4, 8\}$   
 966 performs somewhat similarly. One possible explanation that aligns with empirical observations of  
 967 LLMs is that stochasticity plays a role in obtaining better predictive performance in LLMs, akin  
 968 to how LLMs decoding via sampling based on output token distribution often outperforms greedy  
 969 decoding where tokens are selected deterministically by choosing the most likely token [43].

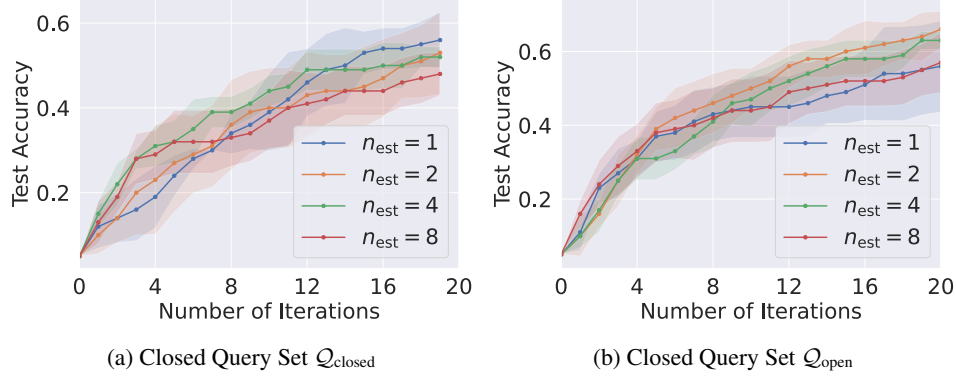

Figure 12: Performance of 20Q with different number of estimation samples. Each curve corresponds to the averaged accuracy over 5 runs, with shaded areas representing their standard deviation.

### 970 F.3 Varying Number of Queries Sampled for Open Query Set.

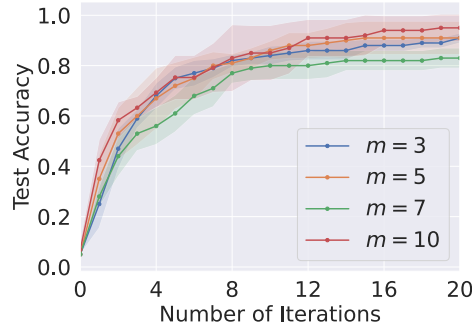

Figure 13: Performance of 20Q in the open query setting with different number of sampled queries  $m$ . Here we focus on Free-text Query Answer  $\mathcal{A}_{\text{free-text}}$ . Each curve corresponds to the averaged accuracy over 5 runs, with shaded areas representing their standard deviation.

971 We evaluate whether C-IP on Llama-3.1-8B for 20Q with the open query set  $\mathcal{Q}_{\text{open}}$  is sensitive to the  
 972 number of queries  $m$  asked at each iteration (Figure K). We observe a comparable performance for  
 973 all choices of  $m$ .



## 974 **G Implementation Details**

### 975 **G.1 Code Release**

976 Our code will be released upon acceptance. For now please refer to the zip attached to the supple-  
977 mentary materials in submission.

### 978 **G.2 Computational Resources**

979 The experiments are conducted on a workstation of 8 NVIDIA A5000 GPUs. Each LLM used in this  
980 work is able to load and run on a single A5000 GPU.

### 981 **G.3 Code**

982 All experiments are implemented in Python 3.12. The main packages used are hugging-  
983 face, PyTorch, Numpy, and TogetherAI API (for UoT baseline). The three models used  
984 are meta-llama/Meta-Llama-3.1-8B-Instruct, microsoft/Phi-3-small-128k-instruct,  
985 and Qwen/Qwen2.5-7B-Instruct. Unless stated otherwise, we use the default hyperparame-  
986 ters from huggingface. We use the following LLM hyperparameters every time we inference:  
987 do\_sample=True, temperature=0.7, and max\_new\_tokens=1024.

### 988 **G.4 Classes for 20Q and MediQ**

989 For 20Q, we select 20 classes from all 50 classes that are available in the Animals with Attributes  
990 2 [130] dataset. The 20 classes are: giraffe, zebra, elephant, killer whale, dalmatian, polar bear, giant  
991 panda, hippopotamus, rhinoceros, lion, tiger, blue whale, walrus, grizzly bear, siamese cat, cow,  
992 german shepherd, gorilla, dolphin, and moose.

993 For MediQ, each medical question is a multiple-choice question with four options: A, B, C, and D.  
994 Note that the possible choices and order of the options are different for each problem.

### 995 **G.5 Obtaining Probabilities from LLM**

996 In this work, we focus on LLMs where logit scores of output tokens are accessible. While there  
997 are many methods for obtaining a posterior distribution  $\mathbb{P}(Y \mid \mathcal{H}_k)$  for a given  $x$ , we estimate the  
998 posterior by first obtaining the LLMs’ output token logits based on the class labels’ tokens, then  
999 applying softmax function. When certain class names consist of multiple tokens, we select the first  
1000 token’s probability to represent the class’s probability. For all of our models, none of the classes  
1001 consist of the same *first* token. In the case that happens, one may consider adding a prefix such as  
1002 enumerations (“1.”, “2.”, ...) or leveraging special symbols trained with large language models.

### 1003 **G.6 Entropy Estimation**

1004 Estimation of terms such as entropy in (IP) or upper bounds in (C-IP) requires samples of  $(X, Y)$   
1005 pairs. We use 4 randomly drawn samples for all 20Q experiments whenever a entropy term needs  
1006 to be estimated and use 12 randomly drawn samples from the estimation set  $\mathcal{D}_{\text{est}}$  for all MediQ  
1007 experiments.

### 1008 **G.7 Calibration**

1009 Achieving marginal coverage in (11) requires calibration samples. For 20Q, we sample 100 randomly  
1010 drawn labels. For MediQ, we sample 200 randomly drawn datapoints with replacement in the  
1011 calibration set  $\mathcal{D}_{\text{cal}}$ .

### 1012 **G.8 Preprocessing Query Answers for 20Q**

1013 To avoid generating query-answers from LLMs at each iteration for every query, in the case of closed  
1014 query set  $\mathcal{Q}_{\text{closed}}$  and non-binary query-answers, we generate query-answers offline by sampling 10  
1015 possible query-answers for every class and query. Then, in our experiments, for any given query and

class, we select a query answer by uniformly sampling one out of the ten generated answers. For binary answers, we only consider query-answers with “Yes” and “No”, without any variability.

## G.9 Evaluation of Predictive Accuracy

We discuss the two evaluation methods for 20Q and MediQ separately as they are different. 20Q is often played in a manner that the Querier LLM keeps guessing until either it guesses correctly or until the maximum number of iterations  $L$  is reached<sup>6</sup>. Here, we following the same protocol. If the Querier LLM guesses the correct prediction  $\hat{y}_k^*$  at iteration  $k$ , then  $\hat{y}_k = \hat{y}_i^*$  for  $i = k + 1, \dots, L$ . For MediQ, since the neither the Expert LLM or Patient LLM knows what the correct prediction is, we require C-IP to reach the stopping criteria (See Appendix §G.10). For any given datapoint  $x^{\text{obs}}$ , suppose the stopping criterion is reached at iteration  $\tilde{k} < L$  and  $\hat{y}_{\tilde{k}}$  is the prediction. Then we assume the prediction does not change after iteration  $\tilde{k}$  and set  $\hat{y}_i = \hat{y}_{\tilde{k}}$  for  $i = \tilde{k} + 1, \dots, L$ .

## G.10 Stopping Criteria

As mentioned in Section 3.2 Remark 1, arriving at  $I(q(X); Y | \mathcal{H}_k) = 0$  in practice is highly unlikely. Here, we explain how one goes about arrive at an approximation  $I(q(X); Y | \mathcal{H}_k) \approx 0$ .

One approach is to utilize the model confidence  $\mathbb{P}(Y | \mathcal{H}_k)$ . In previous variations of IP, including the generative version [14] and the variational approaches [15, 27], the algorithm stops querying once the posterior  $\mathbb{P}(y | \mathcal{H}_k) > \epsilon$  for any  $y \in \mathcal{Y}$ . This is suited for previous cases because the predictor model  $f$  is learned from training data, which provides better estimates for the posterior. Unfortunately, in the case where model confidence is miscalibrated, this process becomes unstable and unreliable.

Empirically, we observe that while estimated conditional entropy (either with direct computation or with approximation via prediction sets) for every  $q$ , i.e.  $\hat{H}(Y | q(X), \mathcal{H}_k)$ , does not converge to 0 as the sequence length increases. However, it tends to converge to some constant number when the algorithm is confident enough to some number. Hence we propose to calculate the standard deviation between obtained estimations. Precisely, given a query set  $\mathcal{Q}$  (closed or open), the query-answer chain  $q_{1:k}(x^{\text{obs}})$ , and a stopping threshold  $\epsilon$ , the stopping criterion can be described as:

- Step 1. Let

$$c_i = \hat{H}(Y | q(X), \mathcal{H}_k) \quad \text{for } q \in \mathcal{Q}. \quad (14)$$

- Step 2. Compute the estimated standard deviation

$$\bar{c} = \sum_{i=1}^{|\mathcal{Q}|} c_i, \quad \hat{\sigma} = \sqrt{\frac{1}{|\mathcal{Q}|} \sum_{i=1}^{|\mathcal{Q}|} (c_i - \bar{c})^2}. \quad (15)$$

- Step 3. Stop if  $\hat{\sigma} < \epsilon$ , else continue the algorithm.

## G.11 Evaluation of Empirical Coverage

Suppose we have a test set  $\mathcal{D}_{\text{test}} = \{(x_i, y_i)\}_{i=1}^{n_{\text{test}}}$  with size  $n_{\text{test}}$  for evaluation. The empirical coverage at iteration  $k$  is evaluated by

$$\mathbb{P}_{X,Y,Q_{1:k},\mathcal{D}_{\text{cal}}}(Y \in \mathcal{C}_{\hat{\tau}_k}(Q_{1:k}(X))) \approx \frac{1}{n_{\text{test}}} \sum_{i=1}^{n_{\text{test}}} \mathbb{1}\{y_i \in \mathcal{C}_{\hat{\tau}_k}(q_{1:k}(x_i))\}, \quad (16)$$

where  $(x_i, y_i) \in \mathcal{D}_{\text{test}}$  is the  $i$ -th test sample,  $\mathcal{C}_{\hat{\tau}_k}$  is the prediction set for query-answer chains of length  $k$ ,  $q_{1:k}(x_i)$  is the obtained query answer chain (e.g. from C-IP), and  $\mathbb{1}(\cdot)$  is a binary indicator function, which equals to 1 when the condition in the parameter is true and 0 otherwise.

## G.12 Hyperparameters for UoT Baseline

Unless specified below, we follow the default settings as suggested in UoT’s main manuscript [45] and their Github repository <https://github.com/zhiyuanhubj/UoT/tree/main/src/uot>.

<sup>6</sup>This is also consistent with UoT [45].

1053 For results in Table 1, to ensure the fairness of the experiments, we set the number of branches in  
1054 their method (`n_potential_actions` in their code) to 5. Their experimental results are produced  
1055 with API from TogetherAI. Please see their website <https://www.together.ai/> for more details.  
1056 The total charges to produce our results for the three models cost no more than \$50.

## 1057 H Prompts

1058 Here we provide the prompts used in our experiments.

### 1059 H.1 20Q

#### System Instruction for Querier LLM

You are an expert on animals. Your goal is to predict the animal given the information you have gathered. The  
→ animal must be one of the following: {class\_names}. Be as precise and as direct as possible. You may provide  
→ your reasoning first before making a prediction. End your response by making a guess and saying 'The animal is:  
→ X' (e.g. The animal is: dog) at the end of your reasoning, where X is your guess. Do not provide any  
→ additional information. Your response should all fit in a single paragraph. If you are not provided any  
→ information, make a random guess.

#### Input Prompt for Querier LLM Obtaining the Posterior

You have not gathered any information yet. Please make a random guess. # If history is empty

Here is the information you have gathered. # If history is not empty

1. {q1} {q1(x)}
2. {q2} {q2(x)}
3. {q3} {q3(x)}
4. {q4} {q4(x)}
- ...

Given the information you have gathered, make an intermediate SINGLE prediction of what you think the animal is.  
→ First make your guess in the format 'The animal is: X' (e.g. The animal is: dog), where X is your guess, then  
→ provide your reasoning. Do not provide any additional information. Your response should all fit in a single  
→ paragraph. Make sure your prediction is one of the classes: {class\_names}.

#### Input Prompt for Querier LLM Suggesting Queries in Open Query Set Setting

You have not gathered any information yet. Please make a random guess. # If history is empty

Here is the information you have gathered. # If history is not empty

1. {q1} {q1(x)}
2. {q2} {q2(x)}
3. {q3} {q3(x)}
4. {q4} {q4(x)}
- ...

Now suggest {n\_queries\_per\_step} questions.\nReturn the question in this format:\n{"questions": ["QUESTION\_1",  
→ "QUESTION\_2", "QUESTION\_3"]}

#### System Instruction for Expert LLM for Non-binary Query Answers

You are an expert on {label}. Based on the question provided, answer truthfully about the question. Do not  
→ directly tell the other player what you are thinking. Be as precise and as direct as possible, and answer in  
→ complete sentence. For example, if the question is "Does the animal have a tail?", you can answer "The animal  
→ has a tail." without saying yes or no. Do not say the name of the animal in your answer.

#### System Instruction for Expert LLM for Binary Query Answers

You are an expert on {label}. Based on the question provided, answer truthfully about the question. Do not  
→ directly tell the other player what you are thinking. Be as precise and as direct as possible, and answer with  
→ a single word. For example, if the question is "Does the animal have a tail?", you can answer "Yes." or "No."  
→ Do not say the name of the animal in your answer. If you don't know the answer, make a guess. Do not answer  
→ anything other than "Yes." or "No."

### System Instruction for Expert LLM Obtaining the Posterior

You are a medical doctor specialized in {specialty}, trained to provide accurate, evidence-based responses to  
 ↳ medical inquiries. Your goal is to answer questions with clarity, precision, and professionalism while  
 ↳ ensuring your responses align with established medical guidelines. Answer concisely, accurately, and  
 ↳ compassionately. Make a prediction and provide your reasoning as explanation. Respond in the following format:

```
{{"answer": "A/B/C/D", "explanation": "YOUR EXPLANATION HERE"}}
```

### Input Prompt for Expert LLM Obtaining the Posterior

Answer the multiple choice based on the context.

Context: {context}

Question: {question}

Options:

- A - {option\_a}
- B - {option\_b}
- C - {option\_c}
- D - {option\_d}

Please select the most appropriate answer (A/B/C/D).

### System Prompt for Converting Facts into Queries

Convert the medical fact into a question, in which the answer is the fact itself. The question should be specific  
 ↳ and relevant to the patient's condition. Please do not ask any questions that are not related to the patient's  
 ↳ medical history or condition. Suggest one question only. Return only your question and nothing else.

Medical fact: He has a non-productive cough for 4 months.  
 Question: What are some preliminary symptoms?

Medical fact: He complains of nausea and 1 episode of vomiting during the past day.  
 Question: Did the patient complain about nausea?

### System Prompt for Converting Facts into Queries

Medical fact: {fact}



## I Pseudocode for Implementation

---

**Algorithm 1** Constructing Prediction set functions for each length  $\mathcal{C}_{\hat{\tau}_1} \dots \mathcal{C}_{\hat{\tau}_L}$ .

---

**Input:** Calibration set  $\mathcal{D}_{\text{cal}}$  with  $n_{\text{cal}}$  samples, Desired Coverage  $1 - \alpha$ , maximum iteration  $L$ , LLM-based predictor  $f$ .

```

1: for each length  $k = 1 \dots L$  do
2:
3:   Step 1: Obtain conformal scores
4:   for  $(x_i, y_i) \in \mathcal{D}_{\text{cal}}$  do
5:     Option 1.1: Uniform Sampling
6:     Sample random history  $q_{1:k} \sim Q_{1:k}$  based on Equation 12.
7:
8:     Option 1.2: DP Sampling
9:     Sample histories from direct prompting  $q_{1:k} \sim \text{DP}(X, Y)$  based on Equation 13.
10:    Obtain scores based on LLM's output token logits for each class

```

$$s_i(x_i, y_i) = f(q_{1:k}(x_i))_{y_i}$$

```

11:  end for
12:
13:  Step 2: Quantile Estimation
14:  Estimate quantiles using the obtained scores:

```

$$\hat{\tau}_k = \text{Quantile} \left( \{s_i\}_{i=1}^{n_{\text{cal}}}, \frac{[(n_{\text{cal}} + 1)(1 - \alpha)]}{n_{\text{cal}}} \right)$$

```

15:
16:  Step 3: Prediction Set Construction
17:  Construct and define the prediction set function using the calculated quantile

```

$$\mathcal{C}_{\hat{\tau}_k}(q_{1:k}(x)) = \{y \in \mathcal{Y} \mid f(q_{1:k}(x)) > \hat{\tau}\}$$

```

18: end for
19: return Prediction set functions for each length  $\mathcal{C}_{\hat{\tau}_1} \dots \mathcal{C}_{\hat{\tau}_L}$ .

```

---



---

**Algorithm 2** Information Pursuit with a closed query set  $\mathcal{Q}_{\text{closed}}$ .

---

**Input:** Observation or test sample  $x^{\text{obs}}$ , maximum iteration  $L$ , LLM-based predictor  $f$ , query set  $\mathcal{Q} = \mathcal{Q}_{\text{closed}}$ , estimation set  $\mathcal{D}_{\text{est}}$

**Output:** Selected queries  $q_{1:k}$  and predictions  $\hat{y}_{1:k}$

```

1: Set iteration  $k \leftarrow 0$ 
2: Initialize an empty history  $\mathcal{S}_0 = \{\}$ 
3: while stopping criteria is met or  $k < L$  do
4:   Predict  $y_{k+1} = \arg\max_{y \in \mathcal{Y}} f(y \mid \mathcal{S}_k)$ 
5:   Estimate the entropy of  $Y$  given each query  $q$  using  $\mathcal{D}_{\text{est}}$  select the most informative query

```

$$q_{k+1} = \underset{q \in \mathcal{Q}}{\text{argmin}} H(Y \mid q(X), \mathcal{S}_k)$$

```

6:   Compute query answer  $q_{k+1}(x^{\text{obs}})$  and update current history

```

$$\mathcal{S}_{k+1} = \mathcal{S}_k \cup \{q_{k+1}(x^{\text{obs}})\}$$

```

7:    $k \leftarrow k + 1$ 
8: end while

```

---

---

**Algorithm 3** Information Pursuit with an open query set  $\mathcal{Q}_{\text{open}}$ .

---

**Input:** Observation or test sample  $x^{\text{obs}}$ , maximum iteration  $L$ , LLM-based predictor  $f$ , an LLM  $\text{LLM}(\cdot)$ ,  $m$  queries to sample at each iteration, estimation set  $\mathcal{D}_{\text{est}}$

**Output:** Selected queries  $q_{1:k}$  and predictions  $\hat{y}_{1:k}$

- 1: Set iteration  $k \leftarrow 0$
- 2: Initialize an empty history  $\mathcal{S}_0 = \{\}$
- 3: **while** stopping criteria is met or  $k < L$  **do**
- 4:     Predict  $\hat{y}_{k+1} = \arg\max_{y \in \mathcal{Y}} f(y \mid \mathcal{S}_k)$
- 5:     Prompt language model for  $m$  queries based on current history

$$\mathcal{Q} = \{q_j\}_{j=1}^m \leftarrow \text{LLM}(\mathcal{Y}, q_{1:k}(x^{\text{obs}}), m)$$

- 6:     Estimate the entropy of  $Y$  given each query  $q$  using  $\mathcal{D}_{\text{est}}$  select the most informative query

$$q_{k+1} = \underset{q \in \mathcal{Q}}{\operatorname{argmin}} H(Y \mid q(X), \mathcal{S}_k)$$

- 7:     Compute query answer  $q_{k+1}(x^{\text{obs}})$  and update current history

$$\mathcal{S}_{k+1} = \mathcal{S}_k \cup \{q_{k+1}(x^{\text{obs}})\}$$

- 8:      $k \leftarrow k + 1$
  - 9: **end while**
- 

---

**Algorithm 4** Conformal Information Pursuit with a closed query set  $\mathcal{Q}_{\text{closed}}$ .

---

**Input:** Observation or test sample  $x^{\text{obs}}$ , maximum iteration  $L$ , LLM-based predictor  $f$ , query set  $\mathcal{Q} = \mathcal{Q}_{\text{closed}}$ , Prediction set functions for each length  $\mathcal{C}_{\hat{\tau}_1} \dots \mathcal{C}_{\hat{\tau}_L}$ , estimation set  $\mathcal{D}_{\text{est}}$

**Output:** Selected queries  $q_{1:k}$  and predictions  $\hat{y}_{1:k}$

- 1: Set iteration  $k \leftarrow 0$
- 2: Initialize an empty history  $\mathcal{S}_0 = \{\}$
- 3: **while** stopping criteria is met or  $k < L$  **do**
- 4:     Predict  $\hat{y}_{k+1} = \arg\max_{y \in \mathcal{Y}} f(y \mid \mathcal{S}_k)$
- 5:     Estimate the entropy of  $Y$  given each query  $q$  using  $\mathcal{D}_{\text{est}}$  select the most informative query

$$q_{k+1} = \min_{q \in \mathcal{Q}} \{ \lambda_\alpha + (1 - \alpha_N) \log \mathbb{E}_X [|\mathcal{C}_{\hat{\tau}_{k+1}}(q(X), \mathcal{S}_k)|] \}$$

- 6:     Compute query answer  $q_{k+1}(x^{\text{obs}})$  and update current history

$$\mathcal{S}_{k+1} = \mathcal{S}_k \cup \{q_{k+1}(x^{\text{obs}})\}$$

- 7:      $k \leftarrow k + 1$
  - 8: **end while**
-

---

**Algorithm 5** Information Pursuit with a open query set  $\mathcal{Q}_{\text{open}}$ .

---

**Input:** Observation or test sample  $x^{\text{obs}}$ , maximum iteration  $L$ , LLM-based predictor  $f$ , an LLM  $\text{LLM}(\cdot)$ ,  $m$  queries to sample at each iteration, Prediction set functions for each length  $\mathcal{C}_{\hat{\tau}_1} \dots \mathcal{C}_{\hat{\tau}_L}$ , estimation set  $\mathcal{D}_{\text{est}}$

**Output:** Selected queries  $q_{1:k}$  and predictions  $\hat{y}_{1:k}$

- 1: Set iteration  $k \leftarrow 0$
- 2: Initialize an empty history  $\mathcal{S}_0 = \{\}$
- 3: **while** stopping criteria is met or  $k < L$  **do**
- 4:     Predict  $\hat{y}_{k+1} = \text{argmax}_{y \in \mathcal{Y}} f(y \mid \mathcal{S}_k)$
- 5:     Prompt language model for  $m$  queries based on current history

$$\mathcal{Q} \leftarrow \text{LLM}(\mathcal{Y}, q_{1:k}(x^{\text{obs}}), m)$$

- 6:     Estimate the entropy of  $Y$  given each query  $q$  using  $\mathcal{D}_{\text{est}}$  select the most informative query

$$q_{k+1} = \min_{q \in \mathcal{Q}} \{ \lambda_\alpha + (1 - \alpha_N) \log \mathbb{E}_X [|\mathcal{C}_{\hat{\tau}_{k+1}}(q(X), \mathcal{S}_k)|] \}$$

- 7:     Compute query answer  $q_{k+1}(x^{\text{obs}})$  and update current history

$$\mathcal{S}_{k+1} = \mathcal{S}_k \cup \{q_{k+1}(x^{\text{obs}})\}$$

- 8:      $k \leftarrow k + 1$
  - 9: **end while**
- 

---

**Algorithm 6** Direct Prompting

---

**Input:** Observation or test sample  $x^{\text{obs}}$ , maximum iteration  $L$ , a Querier LLM  $\text{QuerierLLM}(\cdot)$ , a Expert LLM  $\text{ExpertLLM}(\cdot)$ , LLM-based predictor  $f$

**Output:** Selected queries  $q_{1:k}$  and predictions  $\hat{y}_{1:k}$

- 1: Initialize an empty history  $\mathcal{S}_0 = \{\}$
- 2: **for**  $k = 0, \dots, L$  **do**
- 3:     Predict with  $f$

$$\hat{y}_k = \text{argmax}_{y \in \mathcal{Y}} f(y \mid \mathcal{S}_k)$$

- 4:     Prompt Querier LLM for one single query given history

$$q_{k+1} = \text{QuerierLLM}(\mathcal{S}_k)$$

- 5:     Obtain query answer and update history

$$q_{k+1}(x^{\text{obs}}) = \text{ExpertLLM}(q_{k+1}, x^{\text{obs}})$$

$$\mathcal{S}_{k+1} = \mathcal{S}_k \cup \{q_{k+1}(x^{\text{obs}})\}$$

- 6: **end for**
-

## 1062 J Additional Examples of Query-Answer Chains

1063 In this section, we provide additional examples of query-answer chains obtained using C-IP. All the  
1064 examples we provide in the following are correct predictions. Here we only show the iteration that  
1065 the method stopped.

### 1066 J.1 20Q

1067 Here we provide one example for each setting, which is either open or closed query set and either  
binary or free-text query answers.

#### Example of 20Q with Closed Query Set and Binary Query Answers

```
## System Instruction
You are an expert on animals. Your goal is to predict the animal given the information you have gathered. The
→ animal must be one of the following: 'giraffe', 'zebra', 'elephant', 'killer whale', 'dalmatian', 'polar bear',
→ 'giant panda', 'hippopotamus', 'rhinoceros', 'lion', 'tiger', 'blue whale', 'walrus', 'grizzly bear', 'siamese
→ cat', 'cow', 'german shepherd', 'gorilla', 'dolphin', 'moose'. Be as precise and as direct as possible. You may
→ provide your reasoning first before making a prediction. End your response by making a guess and saying 'The
→ animal is: X' (e.g. The animal is: dog) at the end of your reasoning, where X is your guess. Do not provide
→ any additional information. Your response should all fit in a single paragraph. If you are not provided any
→ information, make a random guess.

## Input Prompt
Here is the information you have gathered.
1. Does the animal live in the Arctic? No.
2. Does the animal have stripes? No.
3. Is the animal domestic? Yes.

Given the information you have gathered, make an intermediate SINGLE prediction of what you think the animal is.
→ First make your guess in the format 'The animal is: X' (e.g. The animal is: dog), where X is your guess, then
→ provide your reasoning. Do not provide any additional information. Your response should all fit in a single
→ paragraph. Make sure your prediction is one of the classes: 'giraffe', 'zebra', 'elephant', 'killer whale',
→ 'dalmatian', 'polar bear', 'giant panda', 'hippopotamus', 'rhinoceros', 'lion', 'tiger', 'blue whale',
→ 'walrus', 'grizzly bear', 'siamese cat', 'cow', 'german shepherd', 'gorilla', 'dolphin', 'moose'.

## Response
The animal is: cow. Given the information that the animal lives in the Arctic is no, which eliminates polar bear,
→ walrus, and grizzly bear, and that it is domestic, which eliminates most wild animals, leaving domesticated
→ options such as a cow.
```

#### Example of 20Q with Closed Query Set and Free-text Query Answers

```
## System Instruction
You are an expert on animals. Your goal is to predict the animal given the information you have gathered. The
→ animal must be one of the following: 'giraffe', 'zebra', 'elephant', 'killer whale', 'dalmatian', 'polar bear',
→ 'giant panda', 'hippopotamus', 'rhinoceros', 'lion', 'tiger', 'blue whale', 'walrus', 'grizzly bear', 'siamese
→ cat', 'cow', 'german shepherd', 'gorilla', 'dolphin', 'moose'. Be as precise and as direct as possible. You may
→ provide your reasoning first before making a prediction. End your response by making a guess and saying 'The
→ animal is: X' (e.g. The animal is: dog) at the end of your reasoning, where X is your guess. Do not provide
→ any additional information. Your response should all fit in a single paragraph. If you are not provided any
→ information, make a random guess.

## Input Prompt
Here is the information you have gathered.
1. This animal primarily inhabits grasslands and savannas, rather than dense forests.

Given the information you have gathered, make an intermediate SINGLE prediction of what you think the animal is.
→ First make your guess in the format 'The animal is: X' (e.g. The animal is: dog), where X is your guess, then
→ provide your reasoning. Do not provide any additional information. Your response should all fit in a single
→ paragraph. Make sure your prediction is one of the classes: 'giraffe', 'zebra', 'elephant', 'killer whale',
→ 'dalmatian', 'polar bear', 'giant panda', 'hippopotamus', 'rhinoceros', 'lion', 'tiger', 'blue whale',
→ 'walrus', 'grizzly bear', 'siamese cat', 'cow', 'german shepherd', 'gorilla', 'dolphin', 'moose'.

## Response
The animal is: zebra. This is because the information provided suggests a grassland or savanna habitat, which
→ aligns with the typical habitats of zebras, as they are commonly found in grasslands and savannas.
```

1068

## Example of 20Q with Open Query Set and Free-text Query Answers

### ## System Instruction

You are an expert on animals. Your goal is to predict the animal given the information you have gathered. The  
→ animal must be one of the following: 'giraffe', 'zebra', 'elephant', 'killer whale', 'dalmatian', 'polar bear',  
→ 'giant panda', 'hippopotamus', 'rhinoceros', 'lion', 'tiger', 'blue whale', 'walrus', 'grizzly bear', 'siamese  
→ cat', 'cow', 'german shepherd', 'gorilla', 'dolphin', 'moose'. Be as precise and as direct as possible. You may  
→ provide your reasoning first before making a prediction. End your response by making a guess and saying 'The  
→ animal is: X' (e.g. The animal is: dog) at the end of your reasoning, where X is your guess. Do not provide  
→ any additional information. Your response should all fit in a single paragraph. If you are not provided any  
→ information, make a random guess.

### ## Input Prompt

Here is the information you have gathered.

1. This animal primarily lives on land.
2. It is native to Europe and Asia, but was later introduced to the Americas and Africa.
3. This animal is a carnivore by natural instinct and primarily feeds on a diet rich in meat.

Given the information you have gathered, make an intermediate SINGLE prediction of what you think the animal is.

→ First make your guess in the format 'The animal is: X' (e.g. The animal is: dog), where X is your guess, then  
→ provide your reasoning. Do not provide any additional information. Your response should all fit in a single  
→ paragraph. Make sure your prediction is one of the classes: 'giraffe', 'zebra', 'elephant', 'killer whale',  
→ 'dalmatian', 'polar bear', 'giant panda', 'hippopotamus', 'rhinoceros', 'lion', 'tiger', 'blue whale',  
→ 'walrus', 'grizzly bear', 'siamese cat', 'cow', 'german shepherd', 'gorilla', 'dolphin', 'moose'.

### ## Response

The animal is: dalmatian. The animal primarily lives on land, which matches with the fact that it is native to  
→ Europe and Asia, but was later introduced to the Americas and Africa, indicating a terrestrial habitat. This  
→ animal is a carnivore by natural instinct and primarily feeds on a diet rich in meat, which aligns with the  
→ characteristics of a dalmatian.

## Example of 20Q with Open Query Set and Binary Query Answers

### ## System Instruction

You are an expert on animals. Your goal is to predict the animal given the information you have gathered. The  
→ animal must be one of the following: 'giraffe', 'zebra', 'elephant', 'killer whale', 'dalmatian', 'polar bear',  
→ 'giant panda', 'hippopotamus', 'rhinoceros', 'lion', 'tiger', 'blue whale', 'walrus', 'grizzly bear', 'siamese  
→ cat', 'cow', 'german shepherd', 'gorilla', 'dolphin', 'moose'. Be as precise and as direct as possible. You may  
→ provide your reasoning first before making a prediction. End your response by making a guess and saying 'The  
→ animal is: X' (e.g. The animal is: dog) at the end of your reasoning, where X is your guess. Do not provide  
→ any additional information. Your response should all fit in a single paragraph. If you are not provided any  
→ information, make a random guess.

### ## Input Prompt

Here is the information you have gathered.

1. Does the animal primarily eat plants? No.
2. Does the animal primarily live on land? Yes.
3. Does the animal have four legs? Yes.
4. Does the animal have a large body size (over 400 kg)? Yes.
5. Does the animal live in a herd? No.
6. Is the animal known to be aggressive? Yes.
7. Does the animal have a long neck? No.
8. Does the animal have sharp claws? Yes.
9. Is the animal a carnivore? Yes.
10. Is the animal a mammal? Yes.

Given the information you have gathered, make an intermediate SINGLE prediction of what you think the animal is.

→ First make your guess in the format 'The animal is: X' (e.g. The animal is: dog), where X is your guess, then  
→ provide your reasoning. Do not provide any additional information. Your response should all fit in a single  
→ paragraph. Make sure your prediction is one of the classes: 'giraffe', 'zebra', 'elephant', 'killer whale',  
→ 'dalmatian', 'polar bear', 'giant panda', 'hippopotamus', 'rhinoceros', 'lion', 'tiger', 'blue whale',  
→ 'walrus', 'grizzly bear', 'siamese cat', 'cow', 'german shepherd', 'gorilla', 'dolphin', 'moose'.

### ## Response

The animal is: lion. I based my prediction on the fact that the animal is a carnivore (9), lives on land (2), has  
→ a large body size (4), and is known to be aggressive (6). These characteristics are commonly associated with  
→ big cats, and the lion is one of the most aggressive and large land carnivorous mammals.



## 1069 J.2 MediQ

- 1070 Here we provide one example for each specialty. Recall that, query answers (denoted as Patient's  
 1071 Fact in the prompt), is obtained in the order that C-IP obtains. When formatting as input, we ignore  
 1072 the query as that provides repetitive information as the query answer.
- 1073 Some text that involves characters  $\alpha, \beta, \mu$  are unable to render in our example, so we replace with  
 with spelled out words, i.e.  $\alpha \rightarrow$  "alpha".

### Example of Diagnosis in Internal Medicine

```
## Input
You are a medical doctor answering real-world medical entrance exam questions. Based on your understanding of
↳ basic and clinical science, medical knowledge, and mechanisms underlying health, disease, patient care, and
↳ modes of therapy, answer the following multiple choice question. Select one correct answer from A to D. Base
↳ your answer on the current and standard practices referenced in medical guidelines. Respond in the following
↳ format:

{"answer": "A/B/C/D", "explanation": "YOUR EXPLANATION HERE"}
```

Answer the multiple choice based on the context.

Initial Info: A 54-year-old woman presents to the emergency department due to recent onset of a high fever,  
 ↳ accompanied by severe headache and neck stiffness.

Conversation Log between doctor and patient:  
 Here is the information you have gathered.  
 Patient's Fact: The patient's current blood pressure reading is 112/71 mmHg.  
 Patient's Fact: She is currently on immunosuppressants after a kidney transplant 6 months ago. Her current  
 ↳ medication regimen includes immunosuppressants.  
 Patient's Fact: The patient is 54 years old.  
 Patient's Fact: The patient has a history of rapidly progressive glomerulonephritis. She also underwent a kidney  
 ↳ transplant 6 months ago and is currently on immunosuppressants.  
 Patient's Fact: The patient's current body temperature is 102.2°F (39°C).  
 Patient's Fact: The patient's neck pain is severe with neck flexion and reciprocal knee flexion. Facts 9 and 9 are  
 ↳ the answer to this question.  
 Patient's Fact: The patient cannot answer the question about the typical triad of symptoms associated with  
 ↳ meningitis.  
 Patient's Fact: Her respirations are 22/min.

Question: Which of the following characteristics is true of the most likely cause of this patient's disorder?  
 Options:  
 A - Anaerobic spore forming rods  
 B - Catalase-negative  
 C - Coagulase-positive  
 D - Tumbling motility in broth

Please select the most appropriate answer (A/B/C/D).

Medical conditions are complex, so you should seek to understand their situations across many features. First,  
 ↳ consider which medical specialty is this patient's case; then, consider a list of necessary features a doctor  
 ↳ would need to make the right medical judgment. Think step by step, reason about the patient information, the  
 ↳ inquiry, and the options.

```
## Response
{"answer": "D", "explanation": "The patient's presentation of high fever, severe headache, neck stiffness, and
↳ neck pain with neck flexion and reciprocal knee flexion (positive Brudzinski's sign) suggests meningitis,
↳ which is an inflammation of the protective membranes covering the brain and spinal cord, known as the meninges.
↳ Given the patient's history of immunosuppression following a kidney transplant, she is at increased risk for
↳ opportunistic infections. The patient's inability to answer questions about the typical triad of symptoms
↳ associated with meningitis (headache, fever, and stiff neck) further supports this diagnosis.

The patient's age and immunosuppressed state make her susceptible to various pathogens, but the most likely cause
↳ of meningitis in this context is Listeria monocytogenes. Listeria monocytogenes is a gram-positive,
↳ catalase-negative bacterium that exhibits tumbling motility in broth. This characteristic is unique to
↳ Listeria species, making option D the correct answer.

Listeria monocytogenes is a common cause of meningitis in immunocompromised individuals, particularly those with a
↳ history of organ transplantation. It is also a cause of meningitis in pregnant women, the elderly, and
↳ individuals with certain underlying medical conditions. The other options do not accurately describe the
↳ typical characteristics of Listeria monocytogenes. Anaerobic spore-forming rods (option A) are more commonly
↳ associated with Clostridium species. Coagulase-positive (option C) is characteristic of Staphylococcus aureus,
↳ and while some anaerobic bacteria may exhibit catalase-negative (option B), this is not a specific
↳ characteristic of the most likely cause of this patient's disorder."}
```

1074

## Example of Diagnosis in Pediatrics

### ## Input

You are a medical doctor answering real-world medical entrance exam questions. Based on your understanding of  
↳ basic and clinical science, medical knowledge, and mechanisms underlying health, disease, patient care, and  
↳ modes of therapy, answer the following multiple choice question. Select one correct answer from A to D. Base  
↳ your answer on the current and standard practices referenced in medical guidelines. Repond in the following  
↳ format:

```
{"answer": "A/B/C/D", "explanation": "YOUR EXPLANATION HERE"}
```

Answer the multiple choice based on the context.

Initial Info: An 8-year-old girl of Asian descent is brought to the physician because of fatigue.

Conversation Log between doctor and patient:

Here is the information you have gathered.

Patient's Fact: The patient's eye color and appearance is that she has pale conjunctivae.

Patient's Fact: The patient's mean corpuscular volume is 74  $\mu\text{m}^3$ .

Patient's Fact: The chief complaint in this case is fatigue. She is not able to keep up with the rest of her

↳ classmates in gym class because she tires easily.

Patient's Fact: The patient tires easily during physical activities because she is not able to keep up with her

↳ classmates in gym class and is brought to the physician because of fatigue. This is also due to her pale

↳ conjunctivae and small, pale red blood cells.

Patient's Fact: She has a serum ferritin level of 77 ng/mL.

Patient's Fact: The patient's current Hemoglobin level is 11.0 g/dL.

Patient's Fact: She has normal hemoglobin electrophoresis. Hemoglobin electrophoresis is normal.

Question: Which of the following best describes the pathogenesis of the disease process in this patient?"

Options:

- A - Decreased production of beta-globin proteins
- B - Amino acid substitution in the beta-globin protein
- C - Cis deletion of alpha-globin genes
- D - Acquired inhibition of heme synthesis

Please select the most appropriate answer (A/B/C/D).

Medical conditions are complex, so you should seek to understand their situations across many features. First,  
↳ consider which medical specialty is this patient's case; then, consider a list of necessary features a doctor  
↳ would need to make the right medical judgment. Think step by step, reason about the patient information, the  
↳ inquiry, and the options.

### ## Response

```
{"answer": "C", "explanation": "This patient's presentation of fatigue, pale conjunctivae, and small, pale red  
↳ blood cells (microcytosis) is suggestive of anemia. The patient's mean corpuscular volume (MCV) of 74  $\mu\text{m}^3$   
↳ indicates a microcytic anemia. The normal hemoglobin electrophoresis rules out hemoglobinopathies such as  
↳ sickle cell disease or thalassemia major. The serum ferritin level of 77 ng/mL is elevated, which suggests  
↳ iron overload. However, the patient's hemoglobin level is low, which is not consistent with iron overload. The  
↳ most likely diagnosis is beta-thalassemia trait, which is a mild form of thalassemia. Beta-thalassemia trait  
↳ is caused by a cis deletion of one of the beta-globin genes, leading to reduced production of the beta-globin  
↳ protein. This results in a mild anemia, which is consistent with the patient's presentation. The patient's  
↳ fatigue and pale conjunctivae are due to the anemia, and the small, pale red blood cells are consistent with  
↳ microcytic anemia. The normal hemoglobin electrophoresis and elevated ferritin level support this diagnosis.  
↳ Therefore, the correct answer is C - Cis deletion of alpha-globin genes is incorrect, as the patient has  
↳ beta-thalassemia trait, not alpha-thalassemia. The correct answer is actually Cis deletion of beta-globin  
↳ genes but the options provided do not have beta-globin, so the closest option is C."}
```

## Example of Diagnosis in Neurology

### ## Input

You are a medical doctor answering real-world medical entrance exam questions. Based on your understanding of basic and clinical science, medical knowledge, and mechanisms underlying health, disease, patient care, and modes of therapy, answer the following multiple choice question. Select one correct answer from A to D. Base your answer on the current and standard practices referenced in medical guidelines. Respond in the following format:

```
{"answer": "A/B/C/D", "explanation": "YOUR EXPLANATION HERE"}
```

Answer the multiple choice based on the context.

Initial Info: A 25-year-old man presents to the ER after a street fight.

Conversation Log between doctor and patient:

Here is the information you have gathered.

Patient's Fact: He has been rapidly decompensating since several hours after the initial hit. Since then, he has been rapidly decompensating.

Patient's Fact: The patient cannot answer the question about the exact cause of the altered mental status and head pain. However, the patient is experiencing head pain and altered mental status. The atomic factual statements that answer the question partially are: - He is grabbing his head in pain.- His mental status is altered.

Patient's Fact: The patient's right pupil is dilated. The information comes from fact #7.

Question: If this patient's symptoms are allowed to progress without intervention, which of the following would be expected to occur?

Options:

- A - Right sided hemiparesis
- B - Down and in gaze of the right pupil
- C - Right sided homonymous hemianopsia.
- D - Right eye with an inability to abduct

Please select the most appropriate answer (A/B/C/D).

Medical conditions are complex, so you should seek to understand their situations across many features. First, consider which medical specialty is this patient's case; then, consider a list of necessary features a doctor would need to make the right medical judgment. Think step by step, reason about the patient information, the inquiry, and the options.

### ## Response

```
{"answer": "A", "explanation": "Based on the patient's symptoms of rapidly decompensating altered mental status and head pain, along with a dilated pupil on the right side, the most likely diagnosis is a mass lesion in the brain, such as a hemorrhage or an ischemic stroke. The dilated pupil is a sign of third cranial nerve (oculomotor nerve) compression, which is often seen in patients with a space-occupying lesion in the brain."}
```

If this patient's symptoms are allowed to progress without intervention, it is likely that the mass lesion will continue to increase in size and cause further brain damage. This could lead to a range of complications, including right-sided hemiparesis, which is weakness on the opposite side of the body from the lesion.

Right-sided hemiparesis is a common consequence of a left-sided brain lesion, as the motor tracts in the brain cross over to the opposite side of the body. The other options are not directly related to the expected outcome of a space-occupying lesion in the brain. Down and in gaze of the right pupil would be more consistent with a third cranial nerve palsy, but the patient's symptoms are not consistent with this diagnosis. Right-sided homonymous hemianopsia would be more consistent with a lesion in the visual pathway, and an inability to abduct the right eye would be more consistent with a sixth cranial nerve palsy, which is not suggested by the patient's symptoms."}

## 1075 K Examples of Sampled Queries

1076 Here we provide some brief examples of queries sampled in the 20Q open query set setting. Here the number of queries to sample  $m = 3$ .

### Example of Sampled Queries at Each Iteration

```
[
  "Does the animal have four legs?",
  "Does the animal live on land?",
  "Is the animal a mammal?"
],
[
  "Does the animal have spots or stripes?",
  "Does the animal primarily live on land?",
  "Does the animal have a long neck?"
],
[
  "Does the animal primarily eat plants?",
  "Does the animal live in a group?",
  "Does the animal have a distinctive coat pattern?"
],
[
  "Does the animal have a long neck?",
  "Does the animal primarily eat bamboo?",
  "Does the animal give birth to a single cub at a time?"
],
[
  "Does the animal have a large body size?",
  "Does the animal primarily eat bamboo?",
  "Does the animal have a distinctive coat pattern?"
],
[
  "Does the animal primarily consume bamboo?",
  "Does the animal have retractable claws?",
  "Does the animal have a distinctive pattern of black and white stripes rather than spots?"
],
[
  "Does the animal primarily feed on plants?",
  "Does the animal have a herbivorous diet?",
  "Is the animal native to Asia?"
],
[
  "Does the animal primarily feed on bamboo?",
  "Is the animal a carnivore?",
  "Does the animal have a large body size compared to other land animals?"
],
[
  "Does the animal primarily walk on all fours?",
  "Does the animal have a long gestation period?",
  "Is the animal a member of the Ursidae family?"
],
[
  "Does the animal have a long snout?",
  "Is the animal native to Africa?",
  "Does the animal have a large body size compared to its neck?"
],
[
  "Does the animal primarily live on land?",
  "Is the animal a carnivore?",
  "Does the animal have a large body size compared to other animals on the list?"
]
```

1077
